## Behavioral sleep interventions in multiple sclerosis

### **Behavioral interventions to improve sleep outcomes in people with multiple sclerosis: A systematic review**

David Turkowitch, BS<sup>1</sup>, Sarah J. Donkers, PT, PhD<sup>2</sup>, Silvana L. Costa, PhD<sup>3,4</sup>, Prasanna

Vaduvathiriyam, MLS<sup>5</sup>, Joy Williams, PT, DPT<sup>6</sup>, Catherine Siengasukon, PT, PhD<sup>1</sup>

<sup>1</sup>Department of Physical Therapy, Rehabilitation Science, and Athletic Training, University of Kansas Medical Center, Kansas City, KS, USA

<sup>2</sup>School of Rehabilitation Science, University of Saskatchewan, Saskatoon, Canada,

<sup>3</sup>Center for Neuropsychology and Neuroscience Research, Kessler Foundation, East Hanover, NJ

<sup>4</sup>Department of Physical Medicine and Rehabilitation, Rutgers –New Jersey Medical School, Newark, NJ, USA

<sup>5</sup>A.R. Dykes Library, University of Kansas Medical Center, Kansas City, KS, USA

<sup>6</sup>Rehabilitation Services, Kaiser Permanente Sacramento, Sacramento, CA, USA

**Acknowledgement:** The results of this systematic review will be presented at ACRM 2022

#### **Disclosures:**

David Turkowitch: None

Sarah J. Donkers: None

Silvana L. Costa: None

Prasanna Vaduvathiriyam: None

Joy Williams: None

Catherine Siengasukon: owner and CEO of Sleep Health Education, LLC

## Behavioral sleep intervention in multiple sclerosis

### **Address Correspondence to:**

Catherine F. Siengsukon, PT, Ph.D.

University of Kansas Medical Center

3901 Rainbow Blvd, Mail Stop 2002

Kansas City, KS 66160

Phone: 913-588-6913

Fax: 913-588-4568

E-mail: [csiengsukon@kumc.edu](mailto:csiengsukon@kumc.edu)

Twitter: [@KatieSleepPT](#)

## Behavioral sleep intervention in multiple sclerosis

### **Abstract:**

*Objective:* To determine effective behavioral interventions to improve sleep in people with MS.

*Methods:* Systematic review following PRISMA guidelines.

*Data Sources:* Literature searches were performed in December 2021 in Ovid MEDLINE, CINAHL, and Web of Science along with hand searching for grey literature and cited references. Out of the 837 search results, 830 unique references were reviewed after duplicates were removed.

*Study Selection:* Four reviewers independently reviewed titles and abstracts (two reviewers for each article), and a fifth reviewer resolved discrepancies. The full-text articles (n = 81) were reviewed independently by four reviewers (two for each article) for eligibility, and consensus for inclusion was achieved by a fifth reviewer as needed. Thirty-seven articles were determined eligible for inclusion.

*Data Extraction:* Four reviewers extracted relevant data from each study (two reviewers for each article) using a standard data-extraction table. Consensus was achieved for completeness and accuracy of the data extraction table by a fifth reviewer. Four reviewers (two reviewers for each article) conducted a quality appraisal of each article to assess the risk for bias and quality of the articles and consensus was achieved by a fifth reviewer as needed.

*Data Synthesis:* Descriptions were used to describe types of interventions, sleep outcomes, results, and key components across interventions.

*Conclusions:* The variability in the intervention types, intervention dose, outcomes used, training/expertise of interventionist, specific sample included, and quality of the study made it difficult to compare and synthesize results. Overall, the CBT-I, CBT/psychotherapy, and education/self-management support interventions reported positive improvements in sleep

## Behavioral sleep intervention in multiple sclerosis

outcomes. The quality appraisal scores ranged from low to high quality indicating potential for bias. Further research is necessary to demonstrate efficacy of most of the interventions.

**Keywords:** Behavioral Intervention, Multiple Sclerosis, Sleep, Exercise, Physical Activity, CBT-I, CBT, Mindfulness, Education, Complementary Medicine

### **Abbreviations:**

CBT: cognitive behavioral therapy; CBT-I: cognitive behavioral therapy for insomnia; ESS: Epworth Sleepiness Scale; International Restless Legs Syndrome Study Group Scale; ISI: Insomnia Severity Index; JBI: Joanna Briggs Institute; MS: multiple sclerosis; NeuroQoL: Quality of Life in Neurological Conditions; PRISMA: Preferred Reporting Items for Systematic Reviews and Meta-Analyses; PROMIS: Patient-Reported Outcomes Measurement and Information System; PROSPERO: Prospective Register of Systematic Reviewers; PSQI: Pittsburgh Sleep Quality Index; RCT: randomized controlled trial(s); RLS: restless legs syndrome; SCL-90: Symptom Checklist-90; WASO: wake after sleep onset

## Behavioral sleep intervention in multiple sclerosis

Nearly one million people in the US are living with multiple sclerosis (MS), and in this population, disturbed sleep is a very common challenge.<sup>1-3</sup> Sleep problems are significantly more common in people with MS than in the general population, estimated at nearly 70% of individuals with MS.<sup>4,5</sup> However, the incidence is likely higher as sleep disorders in individuals with MS are severely underdiagnosed.<sup>6,7</sup>

Common contributors of sleep disturbances in people with MS include nocturia, muscle spasticity, depression, anxiety, and pain.<sup>8-10</sup> Furthermore, neuropathology due to MS may have direct physiological impact on the circadian rhythm,<sup>11,12</sup> and side effects from medications can also have a significant effect on sleep, further complicating the treatment of sleep disturbances.<sup>9</sup> Sleep disturbances in people with MS have been associated with poorer cognitive performance, lower quality of life, higher disability, and increased prevalence of pain, fatigue, depression, anxiety, and sexual and bladder dysfunction.<sup>13-18</sup> Because of the overlapping symptoms of MS and disturbed sleep, poor sleep in people with MS is a complicated issue to treat.

Various pharmacological and lifestyle/behavioral interventions have been studied to address sleep disturbances in people with MS. Although pharmacological interventions are appropriate in certain cases, medication can have negative side effects (such as sedation, dizziness, cognitive impairment, and motor incoordination) and concerns for long-term use including exacerbation of sleep disturbances and insomnia.<sup>19-21</sup> Conversely, behavioral interventions for the treatment of MS are safe for short and long-term use, have shown promising impact on sleep issues, may be more accessible, and may potentially modify the disease process.<sup>22</sup> Behavioral interventions that have shown effective, durable, and safe results include cognitive behavioral therapy for insomnia (CBT-I), physical activity, mindfulness training,

## Behavioral sleep intervention in multiple sclerosis

education, and psychotherapy. However, the effective components of sleep interventions in people with MS have yet to be summarized.

Accordingly, this systematic review focuses on the behavioral interventions being implemented to improve sleep in people with MS. The body of research examining behavioral interventions to improve sleep in people with MS is large and rapidly expanding; thus, the literature in the field has been assembled for close examination. The purpose of this systematic review is to determine effective behavioral interventions to improve sleep in people with MS. It is anticipated that this systematic review will act as a guide for clinical practice and future research in this burgeoning field by identifying efficacious behavioral interventions to enhance sleep as well as gaps in knowledge.

### **Methods**

The Preferred Reporting Items for Systematic Reviews and Meta-Analyses (PRISMA) guidelines were used for identifying the standards of this review protocol. This systematic review was prospective registered at the International Prospective Register of Systematic Reviewers (PROSPERO; ID CRD42022302318). Ovid Medline, Embase.com, and Web of Science were used for identifying relevant studies. Both keywords and database provided controlled vocabularies are used in Embase and Ovid Medline databases along with various search techniques and Boolean operators. The Web of Science database was searched using keywords only. These terms included: multiple sclerosis, sleep, sleep wake disorders, circadian rhythm, exercise, exercise therapy, etc. (refer to supplementary file 1 for detailed search strategies). To include non-pharmaceutical intervention outcome of sleep quality, a wide variety of terms such as behavioral therapy, complementary therapy, mind body therapy, muscle relaxation, qigong,

## Behavioral sleep intervention in multiple sclerosis

mindfulness, meditation, etc. were included in the search. Publication of language filters were not applied. Additional resources such as ClinialTrials.gov and Google scholar used for identifying relevant grey literature on the topic were also searched. Searches were performed between December 1st and 28<sup>th</sup>, 2021.

Studies were included in the systematic review if they: (1) involved the study of humans diagnosed with Multiple Sclerosis; (2) consisted of an intervention study design (i.e. pre-post test, randomized and non-randomized trial study design); (3) included lifestyle or behavioral interventions; and (4) included sleep as an outcome. Studies were excluded from the systematic review if they: (1) included the study of animals; (2) involved any other neurologic condition; (3) were written in a non-English language; (4) involved irrelevance to objectives; (5) included non-intervention study design (reviews, opinions, editorials, protocols, cross-sectional, observational); and (6) contained a duplicate data set (same data reported in more than one study).

Each title/abstract was independently reviewed by two of the four reviewers (S.L.C., S.J.D., C.S., and D.T) and determined as eligible or ineligible based on the above inclusion/exclusion criteria). Discrepancies were resolved by a fifth reviewer (J.W.) in order to reach consensus. The same four reviewers then reviewed the full-text manuscripts for eligibility, and consensus was reached on discrepancies by the fifth reviewer.

Data was then extracted from the full-text articles by both a primary reviewer and a secondary reviewer (S.L.C., S.J.D., C.S., and D.T) using a standardized data extraction spreadsheet. Information extracted included the first author, publication year, country the study was conducted, study design, study objective, number of participants enrolled, number of dropouts, participant information including age, MS-type, severity, disease duration, specific

## Behavioral sleep intervention in multiple sclerosis

impairment(s) for eligibility, intervention information including type, dose, interventionist, setting, study assessment timepoints, control group (if included), the primary and sleep outcome(s), and sleep-specific results. Consensus was reached on discrepancies by the fifth reviewer.

To assess the risk for potential bias and quality of the included articles, critical appraisals were independently conducted by four reviewers (two for each article; same reviewers who conducted data extraction), and discrepancies were resolved by the fifth reviewer. Five different quality appraisal tools were used according to article types: National Heart, Lung, and Blood Institute quality assessment for before-after (pre-post) studies with no control group,<sup>23</sup> and Joanna Briggs Institute's (JBI) critical appraisal checklists for randomized controlled trials (RCT), case reports, quasi-experimental studies, and qualitative research.<sup>24</sup> Overall quality scores were then calculated for each study as follows: "yes" = 2, "unclear" and "cannot determine" = 1, and "not reported" or "no" = 0, and a percentage score was calculated.<sup>25</sup> A score of 100% would indicate the highest possible quality score and demonstrate the quality in study design and implementation to reduce potential bias. Because the twelfth question was rated as "not applicable" for all the pre-post study design articles, the denominator was adjusted to eleven X 2 rather than twelve X 2 to calculate overall percent quality score. Also, two questions in the case series quality appraisal were deemed "not applicable" for the case series, so the denominator was adjusted to eight X 2 rather than ten X 2. In order to be consistent with other checklists, a "not reported" option to the JBI RCT checklist was added. Only one reviewer conducted quality appraisal for the qualitative research studies due to her being the sole reviewer with expertise in qualitative design. Also, since there is not a specific checklist for pilot RCTs, the JBI RCT appraisal checklist was used for studies that self-identified as a pilot RCT.



## Behavioral sleep intervention in multiple sclerosis

### Results

The search strategy generated 1,269 total citations. There were 439 duplicates identified and removed, leaving 839 unique results. Subsequent title/abstract review excluded 749 studies, leaving 81 studies for full-text review. Following full text review, 44 studies were excluded, leaving 37 studies for data extraction and quality appraisal (Figure 1).

The studies that met the inclusion/exclusion criteria for this systematic review are summarized in Table 1 (organized by intervention type and by study design). Fifty one percent of the studies were conducted in North America (94% of which were in the United States), 29% in Europe, 23% in Asia, and 3% in Australia. The most prevalent study design was RCT (n=19<sup>26-35</sup>; 54%; of which n=9<sup>36-44</sup> self-identified as being a pilot RCT) followed by single group pre-post design (n=11<sup>45-55</sup>; 31%). Case reports (n=2<sup>56,57</sup>; 6%), qualitative studies (n=2<sup>58,59</sup>; 6%), quasi experimental studies (n=2<sup>60,61</sup>; 6%), and case series (n=1<sup>62</sup>; 3%), were also included. Four of the studies included are secondary analyses,<sup>27,58,59,63</sup> two of which<sup>59,63</sup> analyze data from a primary study also included in this systematic review.<sup>42,60</sup>

Sample sizes ranged from one<sup>56,57</sup> to 218 individuals<sup>29</sup>, and 1,565 individuals were included in total. Participants in all of the studies included were adults ranging in age from 34.3 years old<sup>26</sup> to 60.1 years old.<sup>50</sup> Relapse-remitting MS constituted the majority of MS types for every study except for three studies.<sup>39,51,57</sup> Sleep was stated as the primary outcome in nine<sup>26,27,32,36,41,43,45,46,50</sup> of the 37 studies. The Pittsburg Sleep Quality Index (PSQI) was the most commonly used sleep outcome utilized in 19<sup>26,29-31,35-39,41,42,44,48,50,53-55,57,60</sup> of the studies followed by the Insomnia Severity Index (ISI) (n=10<sup>32-34,37,39,42,44,45,56,62</sup>), actigraphy (n=5<sup>37,38,43,46,60</sup>), and sleep log/diary data (n=5<sup>38,43,46,56,57</sup>); six of the studies incorporated an objective measurement (actigraphy (n=5<sup>38,43,46,56,57</sup>); EEG (n=1<sup>45</sup>)). Interventions included physical activity (n=13<sup>31-33,37-</sup>

## Behavioral sleep intervention in multiple sclerosis

39,41,45,46,50,51,53,55), CBT-I (n=6<sup>42-44,56,57,62</sup>), CBT/psychotherapy (n=4<sup>26,27,30</sup>), mindfulness/relaxation (n=6<sup>28,48,49,58-60</sup>), education and self-management support (n=3<sup>29,36,54,61</sup>), and complementary and alternative interventions including acupuncture<sup>47</sup>, neurofeedback and hypnosis<sup>64</sup>, trauma releasing exercises<sup>52</sup>, foot reflexology<sup>35</sup>, integrated imaginative distention<sup>34</sup> (all n=1). Details regarding sample demographics, intervention provided, and the major sleep findings are summarized by intervention category in Table 2. Results of studies will next be summarized and described by intervention category.

### *Physical activity*

Thirteen of the 37 included studies incorporated physical activity as a behavioral intervention.<sup>31-33,37-39,41,45,46,50,51,53,55</sup> A variety of physical activity interventions were used including resistance training,<sup>46</sup> aerobic exercise,<sup>32,37,41,45</sup> general individualized exercise programs,<sup>39,50</sup> physical activity lifestyle interventions,<sup>31,38,53</sup> yoga,<sup>55</sup> exoskeleton assisted walking,<sup>51</sup> and aquatic exercise.<sup>33</sup> Five of the physical activity studies stated sleep was a primary outcome.<sup>32,41,45,46,50</sup> Of the five studies with sleep as the primary outcome, three were single group pre-post studies<sup>45,46,50</sup>, and two were RCTs<sup>65</sup> (one being a self-identified pilot RCT<sup>41</sup>).

All four pilot physical activity RCTs had statistically significant improvement in sleep outcomes (effect size ranging from small to large).<sup>37-39,41</sup> Siengsukon et al.<sup>41</sup> was the only pilot physical activity RCT in which sleep was explicitly included the primary outcome. Siengsukon et al.<sup>41</sup> reported that both the 12-week moderate-intensity aerobic exercise group and the low impact walking and stretching group experienced large significant improvements on the PSQI, but there was no significant between group difference; however, a significant between group difference was found on the Epworth Sleepiness Scale (ESS; large effect).

## Behavioral sleep intervention in multiple sclerosis

Cederberg & Motl<sup>38</sup> reported on a sample of individuals with MS and restless legs syndrome. After 16 weeks of a physical activity intervention, they observed significant positive effects on the International Restless Legs Syndrome Study Group Scale (IRLS), restless legs syndrome (RLS) severity during the night and during the day while either resting and while active, sleep satisfaction, self-reported time in bed, and total sleep time following a physical activity intervention compared to the waitlist control. In addition, other sleep outcomes demonstrated moderate to large effect sizes although were not statistically significant.

Al-Sharman et al.<sup>37</sup> reported that the six-week moderate-intensity aerobic exercise group had significant moderate-to-large improvements on the global PSQI, ISI, sleep efficiency, and wake time after sleep onset assessed via actigraphy compared to a home exercise group. Furthermore, change in serotonin was significantly correlated with change in PSQI within the aerobic exercise group.

Grubic-Kezele et al.<sup>39</sup> reported a significant large improvement on the ISI following an eight-week individualized exercise program compared to socializing at the MS Society Center. The only PSQI measure that showed a significant large improvement was daytime sleep dysfunction. In addition, other sleep outcomes demonstrated small to large effect sizes although were not statistically significant.

Two of the RCTs reported medium effect sizes for ISI change following eight-week endurance training and coordinative training<sup>65</sup> and eight-week, 2x/week aquatic exercise group.<sup>33</sup> However, between group statistical comparisons were not provided in either study. In the third RCT study,<sup>31</sup> there was a moderate non-significant improvement in PSQI in the intervention group that participated in a 24-week internet-delivered behavioral intervention to increase lifestyle physical activity, and there was no significant between group differences reported.

## Behavioral sleep intervention in multiple sclerosis

Three of the six single group pre-post study design physical activity studies stated sleep was a primary outcome. Jeong et al.<sup>50</sup> reported a slight worsening of PSQI scores from baseline to 3 months of a daily individualized at-home exercise intervention. Sadeghi Bahmani et al.'s study<sup>45</sup> on three weeks of endurance and physiotherapy sessions reported significantly improved ISI scores, sleep onset latency, sleep efficiency, and wake after sleep onset (WASO). Andreu-Caravaca et al.<sup>46</sup> demonstrated improvements in sleep efficiency (via actigraphy) and sleep quality, comfort, feeling of rest, and ease of falling asleep (via Karolinska Sleep Diary) following resistance training sessions compared to non-training sessions.

In the other three single group pre-post study design physical activity studies, sleep was not the primary outcome or it was unclear if sleep was a primary outcome. Vasudevan et al.<sup>55</sup> reported non-significant improvement on the PSQI using a 12-week personalized yoga program. Mehrebani et al.<sup>53</sup> reported significant improvement in sleep quality immediately after a 15-week physical activity intervention; however, the improvement was not sustained seven weeks post-intervention. Kozlowski et al.'s<sup>51</sup> eight-week study on exoskeleton assisted walking reported mixed results using the Quality of Life in Neurological Conditions (NeuroQoL) sleep disturbance scale.

### *CBT-I*

Six<sup>42-44,56,57,62</sup> of the 37 total studies incorporated in this systematic review incorporated a CBT-I intervention, and all reported improved sleep outcomes. Three of these studies were pilot RCTs,<sup>42,44</sup> one of which was a secondary analysis.<sup>43</sup> Two of the CBT-I studies were case reports,<sup>56,57</sup> and one was a case series.<sup>62</sup> Sleep was stated as the primary outcome in only the secondary analysis.<sup>43</sup>

In Siengsukon et al.'s two pilot RCT studies, both the six-week web-based CBT-I<sup>44</sup> and six week in-person CBT-I<sup>42</sup> interventions produced significant large improvements in PSQI, ISI,

## Behavioral sleep intervention in multiple sclerosis

and SSE scores. Secondary analysis by Williams-Cooke et al.<sup>43</sup> of the in-person CBT-I study revealed sleep log data with significant moderate-to-large improvements in sleep efficacy and reduction in time in bed and variability in sleep efficacy. Actigraphy data from the CBT-I group demonstrated a significant large reduction in time in bed and total sleep time from baseline to post-intervention and the active control group showed a significant increase in variability in sleep efficiency.

Both individuals involved in the case reports demonstrated improved sleep outcomes. The case report by Loveless et al.<sup>56</sup> included a mid-50 year old male with relapse remitting MS. After 13 total CBT-I sessions, the patient's sleep log demonstrated an increase in sleep efficiency (from 29.0% to 74.49%) and total sleep time (from 2.69 to 5.86 hours) and decreases in sleep latency (from 145 to 60 minutes), wake after sleep onset (from 240 to 60 minutes), and early morning awakenings (from 110 min to 0 min). The case report by Majendie et al.<sup>57</sup> included a 40-year-old male with secondary progressive MS and sleep disturbance. His global PSQI score improved from ten to five following eight sessions of CBT-I and was reported to be a one 7 months post-treatment. Sleep onset latency, sleep duration, and sleep efficiency also improved, and the participant implemented a medication withdrawal plan during his intervention time frame. In the case series by Clancy et al.<sup>62</sup> most (86%) patients reported improvements in both ISI scores and total sleep time after an average of eight CBT-I sessions.

### *CBT/Psychotherapy*

Three studies were included in the systematic review that incorporated CBT/psychotherapy without a mindfulness focus.<sup>26,27,30</sup> Three were RCTs<sup>26,30</sup>, one of which was a secondary analysis<sup>27</sup>; two studies<sup>26,27</sup> stated sleep was the primary outcome.

## Behavioral sleep intervention in multiple sclerosis

Kiropoulos et al.<sup>30</sup> compared 8 weeks of CBT to treatment as usual and found group differences in PSQI scores both immediately post intervention and at 20 months follow up. Abbasi et al.<sup>26</sup> reported significant differences in sleep quality between a group that received 8 sessions of CBT compared to a control group at both the post intervention and one month follow up timepoints. Baron et al.'s study<sup>27</sup> was a secondary analysis of a study by Mohr et al.<sup>66</sup> and reported a decline in reported insomnia from 78% as baseline to 43% at post treatment of telephone administered psychotherapy for depression.

### *Mindfulness and Relaxation*

There were six studies that incorporated mindfulness and/or relaxation.<sup>48,49,58-60,67</sup> None stated sleep as the primary outcome. One study was an RCT<sup>67</sup>, two were single group pre-post studies<sup>48,49</sup>, one was a quasi-experimental study<sup>60</sup>, and two were qualitative studies consisting of secondary analyses.<sup>58,59</sup>

Cavalera et al.'s<sup>28</sup> RCT reported a strong effect on the Medical Outcomes Study Sleep scale following an eight-week online mindfulness meditation intervention compared to an online psychoeducation control group at the post-intervention evaluation; however, there was no statistical difference between groups after 6 months.

Dayapoglu & Tan's<sup>48</sup> six-week single group pre-post progressive muscle relaxation study demonstrated global PSQI score improvement from pre to post intervention and significant improvement in the PSQI subscales of subjective sleep quality, sleep latency, sleep duration, sleep efficiency, sleep disorder, and daytime dysfunction. Hoogerwerf et al.'s<sup>49</sup> single group pre-post study reported a small non-significant difference between pre, post, and 3-month Symptom Checklist-90 (SCL-90) scores following an eight-week mindfulness-based cognitive therapy intervention.

## Behavioral sleep intervention in multiple sclerosis

The intervention group in Lorenz et al.'s<sup>60</sup> quasi-experimental study showed moderate to large pre-to-post effect on sleep behaviors (not significant), sleep efficiency (significant), and total sleep time (not significant) following an eight-week mindfulness-based stress reduction course study, although both the intervention and control groups had significantly reduced awakenings. There were no statistically significant differences between groups on sleep outcomes at post-intervention, however, there was a small non-significant effect on total sleep time and sleep behavior. Also, a one-way repeated measures ANOVA including baseline, post-intervention, three-month post-intervention for intervention group suggested a non-significant small-to medium effect on self-reported sleep quality and sleep behaviors. Sessanna et al.<sup>59</sup> was a qualitative secondary analysis of the Lorenz et al. study<sup>60</sup> and reported that the formats of the sleep retraining program were acceptable and provided an effective mode of delivery to adults with MS. Simpson et al.'s<sup>58</sup> qualitative secondary analysis of an eight-week mindfulness-based stress reduction study<sup>68</sup> found that improved sleep was commonly reported.

### *Education and Self-management Support*

Four studies focused on MS education/fatigue management.<sup>29,36,54,61</sup> One stated sleep was a primary outcome<sup>36</sup>. Two were RCTs<sup>29</sup>, one of which self-identified as a pilot RCT<sup>36</sup>, one utilized a single group pre-post study design,<sup>54</sup> and one was a retrospective chart review.<sup>61</sup>

Hugos et al.'s<sup>29</sup> RCT study compared two 6-week group programs: one was a multi component fatigue management program and the other was a MS education program (control). While there was no significant change in PSQI at program completion or at the 3-month follow-up in the fatigue management group, there was a significant improvement at the six-month follow-up in the fatigue management group compared to the control group; however, PSQI scores remained poor (> 5) at the six-month follow-up timepoint. Akbarfahimi et al.<sup>36</sup> conducted

## Behavioral sleep intervention in multiple sclerosis

a pilot RCT comparing an occupational therapy-based sleep intervention and care as usual as a control and found that sleep quality significantly improved in the intervention group compared to the control group.

Sauter et al.<sup>54</sup> conducted a single group pre-post study assessing the impact of a fatigue management and reported the PSQI global score was significantly improved after the six-week course and remained improved after 7-9 months, and the sleep efficiency component score was also significantly improved at 7-9 months. Participants were initially divided into either a “treatment first” group or a “waitlist” then treatment group; however, all participants were included in the pre-post intervention statistical analyses. The retrospective study<sup>61</sup> reported significant improvement in sleep disturbances following a 3-4 session individualized cognitive rehabilitation program; however, there was no between groups comparison conducted between the intervention group and the control group.

### *Complementary and Alternative Interventions*

Five studies utilized complementary or alternative interventions to address sleep issues, including acupuncture,<sup>47</sup> neurofeedback and mindfulness used in conjunction with hypnosis,<sup>64</sup> trauma releasing exercises,<sup>52</sup> foot reflexology,<sup>35</sup> and integrated imaginative distention.<sup>34</sup> None included sleep as the primary outcome. Three were RCTs,<sup>34,35</sup> one of which self-identified as a pilot RCT,<sup>64</sup> and two utilized a single group pre-post study design.<sup>47,52</sup>

Sajadi et al.’s<sup>69</sup> RCT reported a significant difference in sleep quality between the group that participated in foot reflexology and the placebo group following the intervention; however, the intervention group’s average PSQI score was significantly worse than the control group’s PSQI score at baseline. Sgoifo et al.’s<sup>34</sup> RCT reported no significant difference in ISI change scores between the integrative imaginative distention intervention group and the waitlist control



## Behavioral sleep intervention in multiple sclerosis

group. In Jensen et al.'s pilot RCT,<sup>64</sup> participants received an intervention with neurofeedback and hypnosis (NF-HYP), mindfulness and hypnosis (MM-HYP), or hypnosis alone (control). There was a large non-significant time x condition effect for sleep disturbance ( $p=0.17$ ;  $\eta^2p = 0.15$ ). There was a large significant time effect for the NF-HYP condition which was maintained at the 1-month reassessment, and there was a large non-significant time effect for the MM-HYP condition which was not maintained at the 1-month reassessment.

Lynning et al.'s<sup>52</sup> study implemented trauma releasing exercise training and found a significant increase in participants sleep quality based on daily self-report measure over the course of the nine-week intervention. Becker et al.<sup>47</sup> reported a significant improvement in PROMIS sleep disturbance scores from before to after acupuncture and health promotion education.

### *Quality Assessment*

The details of the quality appraisal analyses are reported in Table 3. The quality score for the twelve RCTs ranged from 35-73%, the seven pilot RCTs ranged from 31-54%, the two quasi-experimental studies were 50% and 88%, and the eleven pre-post single group design studies ranged from 27-64%. The quality score for the two case reports were 50% and 88%, and the two qualitative studies were 70% and 80%. The quality score for the one case series was 81%.

### **Discussion**

This is the first study to systematically review behavioral interventions to improve sleep in people with MS. The variability in the intervention types, intervention dose, outcomes used, training/expertise of interventionist, specific sample included, and quality of the study made it difficult to compare and synthesize results. Overall, the CBT-I, CBT/psychotherapy, and

## Behavioral sleep intervention in multiple sclerosis

education/self-management support intervention studies reported positive outcomes, and the physical activity, mindfulness/relaxation, and complementary and alternative intervention studies reported mixed results. The quality appraisal scores ranged from low to high quality indicating potential for bias. While results of this systematic review suggest that many of the interventions are feasible and have a positive impact on sleep in people with MS, further research is necessary to demonstrate efficacy of most of the interventions. More attention to tailoring the intervention to the specific sleep issue, intervention dose, consensus on sleep outcome measures, adequate statistical power, including an appropriate comparison group, ensuring adequate training and experience of interventionists and ensuring intervention fidelity, and appropriate blinding is needed in future research.

Only nine out of 37 studies (24%) explicitly stated sleep was a primary outcome. Depression, fatigue, and feasibility were often named as the primary outcomes. This illustrates the lack of behavioral interventions designed to specifically target sleep in people with MS. What may have contributed to the lack of sleep as a primary outcome is that many of the *interventions* themselves were not designed to target sleep specifically. CBT-I which is a multidimension intervention to specifically treat insomnia was the exception, which likely explains the consensus in improved sleep outcomes in people with MS of the included CBT-I studies. CBT-I, which is a multicomponent treatment strategy that addresses behaviors and thoughts that can negatively impact sleep is the recommended first-line treatment of insomnia.<sup>70,71</sup> The other interventions included in this review such as mindfulness, relaxation, and complementary and alternative interventions are less likely to target specific sleep impairments or disturbances but instead target secondary contributors to sleep.

## Behavioral sleep intervention in multiple sclerosis

It was interesting that the physical activity intervention studies had mixed results (eight had positive results, three had positive results although not statistically significant, and two had minimal to no change in sleep outcomes) due to extensive studies showing physical activity has a positive impact on various sleep outcomes in the general populations.<sup>72-76</sup> There are several possible explanations for why physical activity had mixed results on sleep outcomes in people with MS including the studies were underpowered to detect meaningful change, the intervention lacked sufficient dose of physical activity to positively affect sleep, sleep impairment was not a requirement for eligibility, or a larger percentage of individuals with more progressive disability were included in the sample. While the exact mechanisms for how physical activity improves sleep are not clear, one possible mechanism is the rise in body temperature due to physical activity leads to self-induced internal cooling processes that initiate sleep.<sup>76,77</sup> Perhaps due to heat sensitivity in people with MS, the rise in body temperature does not trigger the same internal cooling processes or perhaps other MS symptoms (such as spasticity or pain) mediate the impact on sleep. Additional research is needed to elucidate if physical activity does indeed have a positive impact on sleep outcomes, and if not, then why.

Another challenge with synthesizing the results is the outcomes used to assess sleep were often not valid or reliable measurements of sleep. For example, the primary construct assessed by the NeuroQoL and the Hamilton Depression Rating Scale are not sleep but rather a construct that is associated with sleep; however, these assessments appeared multiple times throughout the review as some studies' sole sleep outcome measure. Also, interestingly, only six (16%) of the included studies used an objective measure of sleep such as actigraphy or EEG, and no study utilized polysomnography. While objective measures reduce potential bias and assess certain constructs of sleep, they are typically more time consuming and more costly. Perhaps because of

## Behavioral sleep intervention in multiple sclerosis

the number of preliminary studies or studies with sleep as a secondary outcome or their ease of administration, many studies included in this systematic review utilized self-report sleep assessments. Because objective and self-report sleep measures assess different sleep constructs,<sup>78</sup> both types of measures should be considered to aid in understanding the effects of behavioral interventions on sleep. Moving forward, studies to assess the impact of behavioral interventions on sleep should use valid and reliable measurements of sleep that are specific to the intended sleep outcome, such as the PSQI to assess self-report sleep quality, the ISI to assess insomnia severity, actigraphy to objectively assess sleep/wake cycle, and polysomnography to assess sleep stages.

Most studies (78%) assessed immediate change in sleep due to the intervention, and only nine studies<sup>26,28-30,40,49,53,54</sup> included longer-term follow-up (range: one month<sup>26,40</sup> to seven-nine months<sup>54</sup>). Importantly, three of the studies demonstrated sleep improvements immediately post intervention but were not maintained at long-term follow-up.<sup>28,40,53</sup> Also, one study did not show positive improvement on sleep at the post-intervention or 3-month follow-up, but did show improvement on sleep at the 6-month follow-up.<sup>29</sup> This illustrates the importance of including longer-term follow-ups to determine maintenance (or lack thereof) in improvement in sleep outcomes (suggesting maintenance of changed behavior) or that the impact of the intervention on sleep may take time to become apparent. Future studies should include delayed reassessments to determine maintenance of improvement or evolution of change in sleep. In addition, because half of the studies that demonstrated initial improvement in sleep failed to maintain improvement as reassessment, future research should consider emphasizing behavior change theories and techniques.

## Behavioral sleep intervention in multiple sclerosis

The quality appraisal that was completed as part of this systematic review highlights limitations and potential biases of the studies included in this review. Many of the studies lacked blinding for participants, interventionists, and/or outcome assessors. Also, many of the RCTs did not include a power analysis and the sample sizes were often small which limits the interpretation of the results. There were numerous participants who dropped out of several studies, and an analysis of the impact of attrition was often absent. These findings from the quality appraisal reveal the potential for bias in the articles included and thus conclusions and interpretation of the results should be viewed with this in mind.

We acknowledge that the JBI critical appraisal checklist for RCTs was used to assess the quality of the self-identified pilot RCTs which likely resulted in a lower quality score for the pilot RCTs. The systematic review team made this decision after thoughtful discussion and after being unable to locate a critical appraisal checklist specifically for pilot RCTs. Pilot RCTs are used to determine feasibility or effect size, while RCTs are used to determine efficacy or effectiveness, and there is debate to whether pilot studies should assess treatment effects or group differences.<sup>79</sup> There is a need for a critical appraisal checklist specific for pilot RCTs, and the determination of “pilot” should be made *a priori* and in accordance with the purpose and design of the study trial. Another note on the importance of language precision is there was often lack of clarity if the reported MS disease duration was from *diagnosis of MS* or *from symptom onset*. This is an important distinction as it can be years from symptoms onset to actual physician diagnosis of MS.

### **Conclusion**

## Behavioral sleep intervention in multiple sclerosis

Overall, this systematic review has summarized the current state of the literature on behavioral interventions for sleep in individuals with MS and suggests that additional well-designed research with the specific intention of assessing the impact of behavioral interventions on *sleep* using valid and reliable sleep measures in people with MS is warranted. The conclusions in this review and future research identified from this review will aid in guiding clinical practice centered around improving sleep in people with MS.

## Behavioral sleep intervention in multiple sclerosis

### References

1. Nelson LM, Wallin MT, Marrie RA, et al. A new way to estimate neurologic disease prevalence in the United States: Illustrated with MS. *Neurology*. 2019;92(10):469-480.
2. Culpepper WJ, Marrie RA, Langer-Gould A, et al. Validation of an algorithm for identifying MS cases in administrative health claims datasets. *Neurology*. 2019;92(10):e1016-e1028.
3. Wallin MT, Culpepper WJ, Campbell JD, et al. The prevalence of MS in the United States: A population-based estimate using health claims data. *Neurology*. 2019;92(10):e1029-e1040.
4. Siengsukon CF, Alshehri M, Aldughmi M. Self-report sleep quality combined with sleep time variability distinguishes differences in fatigue, anxiety, and depression in individuals with multiple sclerosis: A secondary analysis. *Mult Scler J Exp Transl Clin*. 2018;4(4):2055217318815924.
5. Tachibana N, Howard RS, Hirsch NP, Miller DH, Moseley IF, Fish D. Sleep problems in multiple sclerosis. *Eur Neurol*. 1994;34(6):320-323.
6. Braley TJ, Chervin RD. A practical approach to the diagnosis and management of sleep disorders in patients with multiple sclerosis. *Ther Adv Neurol Disord*. 2015;8(6):294-310.
7. Brass SD, Li CS, Auerbach S. The underdiagnosis of sleep disorders in patients with multiple sclerosis. *J Clin Sleep Med*. 2014;10(9):1025-1031.
8. Boe Lunde HM, Aae TF, Indrevag W, et al. Poor sleep in patients with multiple sclerosis. *PLoS One*. 2012;7(11):e49996.
9. Braley TJ. Overview: A Framework for the Discussion of Sleep in Multiple Sclerosis. *Curr Sleep Med Rep*. 2017;3(4):263-271.

## Behavioral sleep intervention in multiple sclerosis

10. Spoormaker VI, van den Bout J. Depression and anxiety complaints; relations with sleep disturbances. *Eur Psychiatry*. 2005;20(3):243-245.
11. Melamud L, Golan D, Luboshitzky R, Lavi I, Miller A. Melatonin dysregulation, sleep disturbances and fatigue in multiple sclerosis. *J Neurol Sci*. 2012;314(1-2):37-40.
12. Soorensen KV, Alslev T, Christensen SE, Jensen NB, Orskov H. CSF somatostatin in multiple sclerosis: reversible loss of diurnal oscillation in relapses. *Neurology*. 1987;37(6):1050-1053.
13. Stanton BR, Barnes F, Silber E. Sleep and fatigue in multiple sclerosis. *Mult Scler*. 2006;12(4):481-486.
14. Braley TJ, Kratz AL, Kaplish N, Chervin RD. Sleep and Cognitive Function in Multiple Sclerosis. *Sleep*. 2016;39(8):1525-1533.
15. Clark CM, Fleming JA, Li D, Oger J, Klonoff H, Paty D. Sleep disturbance, depression, and lesion site in patients with multiple sclerosis. *Arch Neurol*. 1992;49(6):641-643.
16. Hughes AJ, Turner AP, Alschuler KN, et al. Association Between Sleep Problems and Perceived Cognitive Dysfunction Over 12 Months in Individuals with Multiple Sclerosis. *Behav Sleep Med*. 2018;16(1):79-91.
17. Merlino G, Fratticci L, Lenchig C, et al. Prevalence of 'poor sleep' among patients with multiple sclerosis: an independent predictor of mental and physical status. *Sleep Med*. 2009;10(1):26-34.
18. Siengsukon CF, Aldughmi M, Kahya M, et al. Individuals with mild MS with poor sleep quality have impaired visuospatial memory and lower perceived functional abilities. *Disabil Health J*. 2018;11(1):116-121.



## Behavioral sleep intervention in multiple sclerosis

19. Fitzgerald T, Vietri J. Residual Effects of Sleep Medications Are Commonly Reported and Associated with Impaired Patient-Reported Outcomes among Insomnia Patients in the United States. *Sleep Disord.* 2015;2015:607148.
20. Mendelson WB, Roth T, Cassella J, et al. The treatment of chronic insomnia: drug indications, chronic use and abuse liability. Summary of a 2001 New Clinical Drug Evaluation Unit meeting symposium. *Sleep Med Rev.* 2004;8(1):7-17.
21. Miller P, Soundy A. The pharmacological and non-pharmacological interventions for the management of fatigue related multiple sclerosis. *J Neurol Sci.* 2017;381:41-54.
22. Motl RW, Sandroff BM, Kwakkel G, et al. Exercise in patients with multiple sclerosis. *Lancet Neurol.* 2017;16(10):848-856.
23. National Heart L, and Blood Institute. Study quality assessment tools. <https://www.nhlbi.nih.gov/health-topics/study-quality-assessment-tools>. Updated July 2021. Accessed June 8, 2022.
24. Institute. JB. Critical appraisal tools. <https://jbi.global/critical-appraisal-tools>. Published 2020. Accessed March 24, 2022.
25. Lewis J, Mackenzie L. Cognitive changes after breast cancer: a scoping review to identify problems encountered by women when returning to work. *Disabil Rehabil.* 2021:1-19.
26. Abbasi SM, Alimohammadi NP, Pahlavanzadeh SM. Effectiveness of Cognitive Behavioral Therapy on the Quality of Sleep in Women with Multiple Sclerosis: A Randomized Controlled Trial Study. *Int J Community Based Nurs Midwifery.* 2016;4(4):320-328.

## Behavioral sleep intervention in multiple sclerosis

27. Baron KG, Corden M, Jin L, Mohr DC. Impact of psychotherapy on insomnia symptoms in patients with depression and multiple sclerosis. *J Behav Med*. 2011;34(2):92-101.
28. Cavalera C, Rovaris M, Mendozzi L, et al. Online meditation training for people with multiple sclerosis: A randomized controlled trial. *Mult Scler*. 2019;25(4):610-617.
29. Hugos CL, Chen Z, Chen Y, et al. A multicenter randomized controlled trial of two group education programs for fatigue in multiple sclerosis: Short- and medium-term benefits. *Mult Scler*. 2019;25(2):275-285.
30. Kiropoulos LA, Kilpatrick T, Holmes A, Threader J. A pilot randomized controlled trial of a tailored cognitive behavioural therapy based intervention for depressive symptoms in those newly diagnosed with multiple sclerosis. *BMC Psychiatry*. 2016;16(1):435.
31. Pilutti LA, Dlugonski D, Sandroff BM, Klaren R, Motl RW. Randomized controlled trial of a behavioral intervention targeting symptoms and physical activity in multiple sclerosis. *Mult Scler*. 2014;20(5):594-601.
32. Sadeghi Bahmani D, Razazian N, Farnia V, Alikhani M, Tatari F, Brand S. Compared to an active control condition, in persons with multiple sclerosis two different types of exercise training improved sleep and depression, but not fatigue, paresthesia, and intolerance of uncertainty. *Mult Scler Relat Disord*. 2019;36:101356.
33. Sadeghi Bahmani D, Motl RW, Razazian N, Khazaie H, Brand S. Aquatic exercising may improve sexual function in females with multiple sclerosis - an exploratory study. *Mult Scler Relat Disord*. 2020;43:102106.
34. Sgoifo A, Bignamini A, La Mantia L, et al. Integrated Imaginative Distention Therapy to Cope with Fatigue. DIMMI SI Study: The First Randomized Controlled Trial in Multiple Sclerosis. *Neurol Ther*. 2017;6(2):213-223.

## Behavioral sleep intervention in multiple sclerosis

35. Sajadi M, Davodabady F, Ebrahimi-Monfared M. The effect of foot reflexology on fatigue, sleep quality and anxiety in patients with multiple sclerosis: A randomized controlled trial. *Archives of Neuroscience*. 2020;7(3):1-8.
36. Akbarfahimi M, Nabavi SM, Kor B, Rezaie L, Paschall E. The Effectiveness of Occupational Therapy-Based Sleep Interventions on Quality of Life and Fatigue in Patients with Multiple Sclerosis: A Pilot Randomized Clinical Trial Study. *Neuropsychiatr Dis Treat*. 2020;16:1369-1379.
37. Al-Sharman A, Khalil H, El-Salem K, Aldughmi M, Aburub A. The effects of aerobic exercise on sleep quality measures and sleep-related biomarkers in individuals with Multiple Sclerosis: A pilot randomised controlled trial. *NeuroRehabilitation*. 2019;45(1):107-115.
38. Cederberg KLJ, Motl RW. Feasibility and efficacy of a physical activity intervention for managing restless legs syndrome in multiple sclerosis: Results of a pilot randomized controlled trial. *Mult Scler Relat Disord*. 2021;50:102836.
39. Grubić Kezele T, Trope Z, Ahel V, et al. Upper-lower limb and breathing exercise program for improving sleep quality and psychological status in multiple sclerosis: A pilot randomized controlled trial. *Brain Impairment*. 2021.
40. Jensen MP, Battalio SL, Chan JF, et al. USE OF NEUROFEEDBACK AND MINDFULNESS TO ENHANCE RESPONSE TO HYPNOSIS TREATMENT IN INDIVIDUALS WITH MULTIPLE SCLEROSIS: Results From a Pilot Randomized Clinical Trial. *Int J Clin Exp Hypn*. 2018;66(3):231-264.

## Behavioral sleep intervention in multiple sclerosis

41. Siengsukon CF, Aldughmi M, Kahya M, et al. Randomized controlled trial of exercise interventions to improve sleep quality and daytime sleepiness in individuals with multiple sclerosis: A pilot study. *Mult Scler J Exp Transl Clin*. 2016;2:2055217316680639.
42. Siengsukon CF, Alshehri M, Williams C, Drerup M, Lynch S. Feasibility and treatment effect of cognitive behavioral therapy for insomnia in individuals with multiple sclerosis: A pilot randomized controlled trial. *Mult Scler Relat Disord*. 2020;40:101958.
43. Williams-Cooke C, LeSuer L, Drerup M, Siengsukon C. The Impact of Cognitive Behavioral Therapy for Insomnia on Sleep Log and Actigraphy Outcomes in People with Multiple Sclerosis: A Secondary Analysis. *Nat Sci Sleep*. 2021;13:1865-1874.
44. Siengsukon CF, Beck ES, Jr., Drerup M. Feasibility and Treatment Effect of a Web-Based Cognitive Behavioral Therapy for Insomnia Program in Individuals with Multiple Sclerosis: A Pilot Randomized Controlled Trial. *Int J MS Care*. 2021;23(3):107-113.
45. Bahmani DS, Kesselring J, Papadimitriou M, et al. In Patients With Multiple Sclerosis, Both Objective and Subjective Sleep, Depression, Fatigue, and Paresthesia Improved After 3 Weeks of Regular Exercise. *Frontiers in Psychiatry*. 2019;10.
46. Andreu-Caravaca L, Ramos-Campo DJ, Abellan-Aynes O, et al. 10-Weeks of resistance training improves sleep quality and cardiac autonomic control in persons with multiple sclerosis. *Disabil Rehabil*. 2021:1-9.
47. Becker H, Stuijbergen AK, Schnyer RN, Morrison JD, Henneghan A. Integrating Acupuncture Within a Wellness Intervention for Women With Multiple Sclerosis. *Journal of Holistic Nursing*. 2017;35(1):86-96.

## Behavioral sleep intervention in multiple sclerosis

48. Dayapoglu N, Tan M. Evaluation of the effect of progressive relaxation exercises on fatigue and sleep quality in patients with multiple sclerosis. *J Altern Complement Med*. 2012;18(10):983-987.
49. Hoogerwerf AEW, Bol Y, Lobbestael J, Hupperts R, van Heugten CM. Mindfulness-based cognitive therapy for severely fatigued multiple sclerosis patients: A waiting list controlled study. *J Rehabil Med*. 2017;49(6):497-504.
50. Jeong IC, Karpatkin H, Stein J, Finkelstein J. Relationship Between Exercise Duration in Multimodal Telerehabilitation and Quality of Sleep in Patients with Multiple Sclerosis. *Stud Health Technol Inform*. 2020;270:658-662.
51. Kozlowski AJ, Fabian M, Lad D, Delgado AD. Feasibility and Safety of a Powered Exoskeleton for Assisted Walking for Persons With Multiple Sclerosis: A Single-Group Preliminary Study. *Arch Phys Med Rehabil*. 2017;98(7):1300-1307.
52. Lynning M, Svane C, Westergaard K, Bergien SO, Gunnarsen SR, Skovgaard L. Tension and trauma releasing exercises for people with multiple sclerosis - An exploratory pilot study. *J Tradit Complement Med*. 2021;11(5):383-389.
53. Mehrabani G, Aminian S, Norton S, Motl RW, Manns PJ. Preliminary efficacy of the "SitLess with MS" intervention for changing sedentary behaviour, symptoms, and physical performance in multiple sclerosis. *Disabil Rehabil*. 2021:1-8.
54. Sauter C, Zebenholzer K, Hisakawa J, Zeitlhofer J, Vass K. A longitudinal study on effects of a six-week course for energy conservation for multiple sclerosis patients. *Mult Scler*. 2008;14(4):500-505.

## Behavioral sleep intervention in multiple sclerosis

55. Vasudevan S, Devulapally S, Chirravuri K, Elangovan V, Kesavan N. Personalized Yoga Therapy for Multiple Sclerosis: Effect on Symptom Management and Quality of Life. *Int J Yoga Therap.* 2021;31(1).
56. Loveless JP, Russo JM, Andersen VC. The Successful Treatment of Insomnia in a Patient With a Complex Neurological History. *Clinical Case Studies.* 2020;19(2):101-114.
57. Majendie CMA, Dysch L, Carrigan N. Cognitive Behavioral Therapy for Insomnia (CBT-I) for an Adult with Multiple Sclerosis. *Clinical Case Studies.* 2017;16(2):115-131.
58. Simpson R, Byrne S, Wood K, Mair FS, Mercer SW. Optimising mindfulness-based stress reduction for people with multiple sclerosis. *Chronic Illn.* 2018;14(2):154-166.
59. Sessanna L, Nisbet P, Alanazi N, et al. The Experience of Participating in an 8-Week Mindfulness Based Stress Reduction plus Sleep Retraining Course among Women Living with Multiple Sclerosis. *Clin Nurs Res.* 2021;30(5):558-566.
60. Lorenz RA, Auerbach S, Nisbet P, et al. Improving Sleep among Adults with Multiple Sclerosis using Mindfulness plus Sleep Education. *West J Nurs Res.* 2021;43(3):273-283.
61. Munger KC, Martinez AP, Hyland MH. The impact of cognitive rehabilitation on quality of life in multiple sclerosis: A pilot study. *Mult Scler J Exp Transl Clin.* 2021;7(3):20552173211040239.
62. Clancy M, Drerup M, Sullivan AB. Outcomes of Cognitive-Behavioral Treatment for Insomnia on Insomnia, Depression, and Fatigue for Individuals with Multiple Sclerosis: A Case Series. *Int J MS Care.* 2015;17(6):261-267.
63. Williams-Cooke C, LeSuer L, Drerup M, Siengsukon C. The Impact of Cognitive Behavioral Therapy for Insomnia on Sleep Log and Actigraphy Outcomes in People with

## Behavioral sleep intervention in multiple sclerosis

- Multiple Sclerosis: A Secondary Analysis. *Nature & Science of Sleep*. 2021;13:1865-1874.
64. Jensen MP, Battalio SL, Chan J, et al. Use of neurofeedback and mindfulness to enhance response to hypnosis treatment in individuals with multiple sclerosis. *BMC Complementary and Alternative Medicine*. 2017;17.
65. Sadeghi Bahmani D, Razazian N, Farnia V, Alikhani M, Tatari F, Brand S. Compared to an active control condition, in persons with multiple sclerosis two different types of exercise training improved sleep and depression, but not fatigue, paresthesia, and intolerance of uncertainty. *Multiple Sclerosis and Related Disorders*. 2019;36:101356.
66. Mohr DC, Hart SL, Julian L, et al. Telephone-administered psychotherapy for depression. *Arch Gen Psychiatry*. 2005;62(9):1007-1014.
67. Cavalera C, Pagnini F, Rovaris M, et al. A telemedicine meditation intervention for people with multiple sclerosis and their caregivers: study protocol for a randomized controlled trial. *Trials*. 2016;17:4.
68. Simpson R, Mair FS, Mercer SW. Mindfulness-based stress reduction for people with multiple sclerosis - a feasibility randomised controlled trial. *BMC Neurol*. 2017;17(1):94.
69. Sajadi M, Davodabady F, Ebrahimi-Monfared M. The Effect of Foot Reflexology on Fatigue, Sleep Quality and Anxiety in Patients with Multiple Sclerosis: A Randomized Controlled Trial. *Archives of Neuroscience*. 2020;7(3).
70. Wu JQ, Appleman ER, Salazar RD, Ong JC. Cognitive Behavioral Therapy for Insomnia Comorbid With Psychiatric and Medical Conditions: A Meta-analysis. *JAMA Intern Med*. 2015;175(9):1461-1472.

## Behavioral sleep intervention in multiple sclerosis

71. Geiger-Brown JM, Rogers VE, Liu W, Ludeman EM, Downton KD, Diaz-Abad M. Cognitive behavioral therapy in persons with comorbid insomnia: A meta-analysis. *Sleep Med Rev.* 2015;23:54-67.
72. Vanderlinden J, Boen F, van Uffelen JGZ. Effects of physical activity programs on sleep outcomes in older adults: a systematic review. *Int J Behav Nutr Phys Act.* 2020;17(1):11.
73. Kovacevic A, Mavros Y, Heisz JJ, Fiatarone Singh MA. The effect of resistance exercise on sleep: A systematic review of randomized controlled trials. *Sleep Med Rev.* 2018;39:52-68.
74. Kelley GA, Kelley KS. Exercise and sleep: a systematic review of previous meta-analyses. *J Evid Based Med.* 2017;10(1):26-36.
75. Kubitz KA, Landers DM, Petruzzello SJ, Han M. The effects of acute and chronic exercise on sleep. A meta-analytic review. *Sports Med.* 1996;21(4):277-291.
76. Driver HS, Taylor SR. Exercise and sleep. *Sleep Med Rev.* 2000;4(4):387-402.
77. Buman MP, Hekler EB, Bliwise DL, King AC. Moderators and mediators of exercise-induced objective sleep improvements in midlife and older adults with sleep complaints. *Health Psychol.* 2011;30(5):579-587.
78. Bernstein JPK, DeVito A, Calamia M. Subjectively and Objectively Measured Sleep Predict Differing Aspects of Cognitive Functioning in Adults. *Arch Clin Neuropsychol.* 2019;34(7):1127-1137.
79. Abbott JH. The distinction between randomized clinical trials (RCTs) and preliminary feasibility and pilot studies: what they are and are not. *J Orthop Sports Phys Ther.* 2014;44(8):555-558.



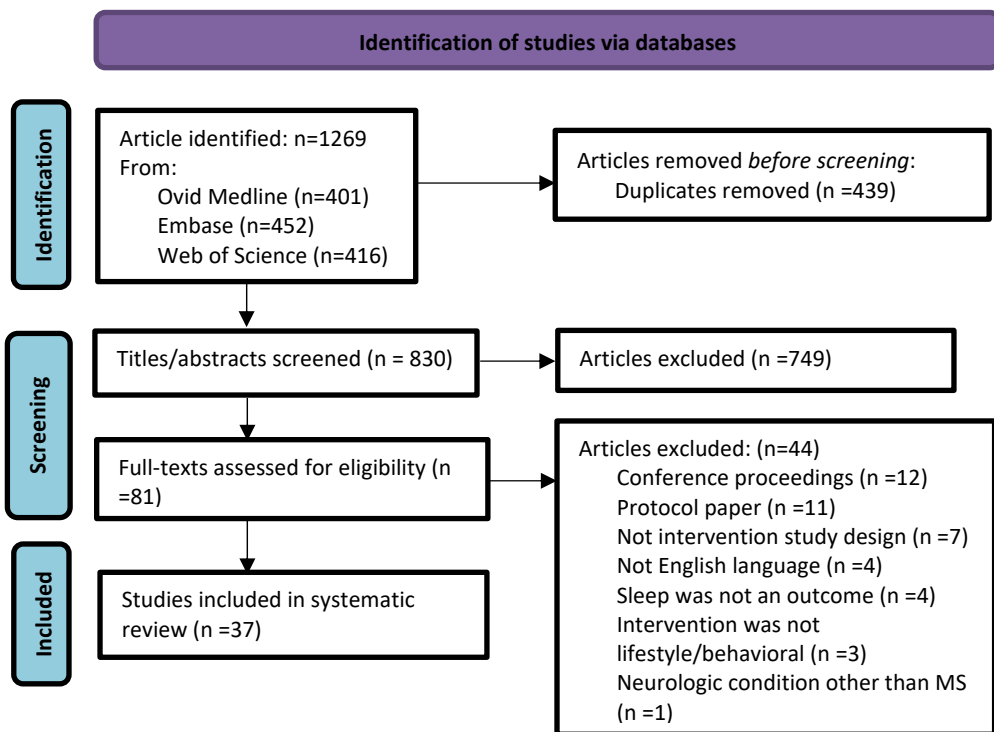

Figure 1. PRISMA flow diagram.

| First author             | Year  | Country     | Study design                                                | n enrolled (dropout) | Intervention Type                                           | Outcomes                       |                                                                                                         |                                                   | Impact on Sleep           |
|--------------------------|-------|-------------|-------------------------------------------------------------|----------------------|-------------------------------------------------------------|--------------------------------|---------------------------------------------------------------------------------------------------------|---------------------------------------------------|---------------------------|
|                          |       |             |                                                             |                      |                                                             | Was Sleep the Primary Outcome? | Primary Outcome                                                                                         | Sleep Outcome                                     |                           |
| <i>Physical Activity</i> |       |             |                                                             |                      |                                                             |                                |                                                                                                         |                                                   |                           |
| Pilutti                  | 2014  | USA         | RCT                                                         | 82 (6)               | Internet-delivered lifestyle physical activity intervention | Unclear                        | Unclear                                                                                                 | PSQI                                              | ↗                         |
| Sadeghi Bahmani          | 2019b | Iran        | RCT                                                         | 92 (21)              | Group aerobic exercise or coordinative training             | Yes                            | ISI                                                                                                     | ISI                                               | +                         |
| Sadeghi Bahmani          | 2020  | Iran        | RCT                                                         | 62 (2)               | Aquatic exercise                                            | No                             | Sexual dysfunction                                                                                      | ISI                                               | ↗                         |
| Al-Sharman               | 2019  | Joran       | Pilot RCT                                                   | 40 (10)              | Moderate-intensity aerobic exercise                         | Unclear                        | Unclear                                                                                                 | PSQI, ISI, actigraphy (in subsample), biomarkers  | +                         |
| Cederberg                | 2021  | USA         | Pilot RCT                                                   | 15 (1)               | Physical activity                                           | Unclear                        | Unclear                                                                                                 | IRLS, PSQI, Seven-Day Diary, Actigraphy GT3X, ESS | +                         |
| Grubic-Kezele            | 2021  | Croatia     | Pilot RCT                                                   | 24 (0)               | Exercise                                                    | Unclear                        | Unclear                                                                                                 | PSQI, ISI                                         | +                         |
| Siengasukon              | 2016  | USA         | Pilot RCT                                                   | 28 (6)               | Aerobic exercise                                            | Yes                            | PSQI, ESS                                                                                               | PSQI, ESS                                         | +                         |
| Andreu-Caravaca          | 2021  | Span        | Single group pre/post test                                  | 18 (0)               | Resistance training                                         | Yes                            | Subject sleep quality (Karolinska sleep diary) and actigraphic sleep quality                            | actigraphy and Karolinska sleep diary             | +                         |
| Jeong                    | 2020  | USA         | Single group pre/post test                                  | 17 (0)               | Exercise telerehabilitation                                 | Yes                            | PSQI                                                                                                    | PSQI                                              | -                         |
| Kozlowski                | 2017  | USA         | Single group pre/post test                                  | 13 (8)               | Exoskeleton-assisted walking                                | No                             | Feasibility and safety                                                                                  | Neuro-QoL sleep disturbance section               | -                         |
| Mehrabani                | 2021  | Canada      | Single group pre/post test                                  | 41 (5)               | Physical activity intervention                              | Unclear                        | Unclear                                                                                                 | PSQI                                              | + [immediate] - [7 weeks] |
| Sadeghi Bahmani          | 2019a | Switzerland | Single group pre/post test                                  | 51 (5)               | Aerobic exercise and physiotherapy                          | Yes                            | Main outcome variables: changes in objective and subjective sleep, depression, fatigue, and paresthesia | EEG, ISI                                          | +                         |
| Vasudevan                | 2021  | India       | Single group pre/post test                                  | 10 (0)               | Personalized yoga therapy                                   | Unclear                        | Unclear                                                                                                 | PSQI                                              | ↗                         |
| <i>CBT-I</i>             |       |             |                                                             |                      |                                                             |                                |                                                                                                         |                                                   |                           |
| Siengasukon              | 2021  | USA         | Pilot RCT                                                   | 41 (21)              | Web-based CBT-I                                             | No                             | Feasibility                                                                                             | ISI, PSQI, SSES, MCSB                             | +                         |
| Siengasukon              | 2020  | USA         | Pilot RCT                                                   | 33 (3)               | CBT-I                                                       | No                             | Feasibility                                                                                             | ISI, PSQI, SSE                                    | +                         |
| Williams-Cooke           | 2021  | USA         | Pilot RCT ( <i>secondary analysis of Siengasukon 2020</i> ) | 25 (3)               | CBT-I                                                       | Yes                            | Actigraphy, sleep log                                                                                   | Actigraphy, sleep log                             | +                         |
| Clancy                   | 2015  | USA         | Case series                                                 | 11 (unclear)         | Individual or group-based CBT-I                             | Unclear                        | Unclear                                                                                                 | ISI, TST                                          | +                         |
| Loveless                 | 2019  | USA         | Case study                                                  | 1 (n/a)              | CBT-I                                                       | Unclear                        | Unclear                                                                                                 | Self-report sleep quality, sleep log, ISI, ESS    | +                         |
| Majendie                 | 2017  | UK          | Case study                                                  | 1 (n/a)              | CBT-I                                                       | Unclear                        | Unclear                                                                                                 | PSQI, sleep diary                                 | +                         |

| CBT/Psychotherapy                           |      |             |                                                     |          |                                                               |         |                                                 |                                                                         |                                                                            |
|---------------------------------------------|------|-------------|-----------------------------------------------------|----------|---------------------------------------------------------------|---------|-------------------------------------------------|-------------------------------------------------------------------------|----------------------------------------------------------------------------|
| Abbasi                                      | 2016 | Iran        | RCT                                                 | 72 (6)   | CBT                                                           | Yes     | PSQI                                            | PSQI                                                                    | + [immediate]<br>+ [1 mo]                                                  |
| Baron                                       | 2011 | USA         | RCT ( <i>secondary analysis</i> )                   | 127 (7)  | Telephone administered psychotherapy for depression           | Yes     | 3 items on the Hamilton Depression Rating Scale | 3 items on Hamilton Depression Rating Scale                             | +                                                                          |
| Kiropoulos                                  | 2016 | Australia   | RCT                                                 | 30 (0)   | CBT                                                           | No      | Depression                                      | PSQI                                                                    | + [immediate]<br>+ [20 weeks]                                              |
| Mindfulness/Relaxation                      |      |             |                                                     |          |                                                               |         |                                                 |                                                                         |                                                                            |
| Cavalera                                    | 2019 | Italy       | RCT                                                 | 139 (49) | Online mindfulness meditation                                 | No      | Multiple Sclerosis Quality of Life-54           | Medical Outcomes Study Sleep scale                                      | + [immediate]<br>- [6 mo]                                                  |
| Lorenz                                      | 2021 | USA         | Quasi-experimental                                  | 34 (16)  | Mindfulness-based stress reduction plus sleep retraining      | No      | Feasibility of intervention                     | Actigraphy, PSQI, FOSQ-10, The Sleep Behavior Self-Rating Scale-Revised | ↗ [immediate]<br>↗ [3 mo]                                                  |
| Sessanna                                    | 2021 | USA         | Qualitative ( <i>secondary analysis of Lorenz</i> ) | 14 (0)   | Mindfulness-based stress reduction plus sleep retraining      | No      | Acceptability                                   | Qualitative reports                                                     | +                                                                          |
| Dayapoglu                                   | 2012 | Turkey      | Single group pre/post test                          | 35 (3)   | Progressive muscle relaxation                                 | Unclear | Unclear                                         | PSQI                                                                    | +                                                                          |
| Hoogerwerf                                  | 2017 | Netherlands | Single group pre/post test                          | 59 (20)  | Mindfulness-based cognitive therapy                           | No      | CIS-20-Fatigue                                  | sleep subscale of the SCL-90                                            | ↗ [immediate]<br>↗ [3 mo]                                                  |
| Simpson                                     | 2018 | Scotland    | Qualitative ( <i>secondary analysis</i> )           | 33 (0)   | Mindfulness-based stress reduction                            | No      | Unclear                                         | Qualitative reports                                                     | +                                                                          |
| Education/Self-management Support           |      |             |                                                     |          |                                                               |         |                                                 |                                                                         |                                                                            |
| Hugos                                       | 2019 | USA         | RCT                                                 | 218 (14) | Multi component fatigue management program                    | No      | MFIS                                            | PSQI                                                                    | - [immediate, 3 mo]<br>+ [6 mo]                                            |
| Akbarfahimi                                 | 2020 | Iran        | Pilot RCT                                           | 22 (2)   | Occupational therapy-based sleep intervention                 | Yes     | PSQI                                            | PSQI                                                                    | +                                                                          |
| Munger                                      | 2021 | USA         | Quasi-experimental - retrospective chart review     | 21 (0)   | Cognitive rehabilitation                                      | No      | NeuroQoL                                        | Sleep disturbance domain on NeuroQoL measure                            | +                                                                          |
| Sauter                                      | 2008 | Austria     | Single group pre/post test                          | 32 (5)   | Fatigue management                                            | Unclear | Not stated                                      | PSQI                                                                    | + [immediate]<br>+ [7-9 mo]                                                |
| Complementary and Alternative Interventions |      |             |                                                     |          |                                                               |         |                                                 |                                                                         |                                                                            |
| Sajadi                                      | 2020 | Iran        | RCT                                                 | 70 (7)   | Foot reflexology                                              | Unclear | Unclear                                         | PSQI                                                                    | +                                                                          |
| Sgoifo                                      | 2017 | Italy       | RCT                                                 | 48 (0)   | Integrated imaginative distention                             | No      | MFIS                                            | ISI                                                                     | -                                                                          |
| Jensen                                      | 2018 | USA         | pilot RCT                                           | 35 (3)   | neurofeedback + hypnosis or mindfulness meditation + hypnosis | No      | Average pain intensity/fatigue severity         | PROMIS Sleep Disturbance Short Form 8-item Version B                    | NF+HYP<br>+ [immediate]<br>+ [1 mo]<br>MM+HYP<br>↗ [immediate]<br>- [1 mo] |
| Becker                                      | 2016 | USA         | Single group pre/post test                          | 14 (0)   | Acupuncture + health promotion education                      | Unclear | Not stated                                      | PROMIS sleep disturbance                                                | +                                                                          |

|         |      |         |                            |       |                            |         |         |                                                                               |   |
|---------|------|---------|----------------------------|-------|----------------------------|---------|---------|-------------------------------------------------------------------------------|---|
| Lynning | 2021 | Denmark | Single group pre/post test | 9 (2) | Trauma releasing exercises | Unclear | Unclear | 5-point numeric rating scale in newly developed patient reported outcome tool | + |
|---------|------|---------|----------------------------|-------|----------------------------|---------|---------|-------------------------------------------------------------------------------|---|

Table 1. Summary of articles. + = improvement in sleep; - = worsening, no improvement in sleep, or mixed results;  $\nabla$  = Improvement not statistically significant; FOSQ-10 = Functional Outcomes of Sleep Questionnaire; MCSB = Motivation to Change Sleep Behavior; SSES = Sleep Self-efficacy Scale; TST = total sleep time

| First author<br>year<br>n enrolled<br>(drop out) | Sample Demographics                                  |                                                                                  |                                                                                                            |                                                | Intervention Details                                                                                                                                           |                                                                               |                                                 | Major Sleep Findings                                                                                                                                                                                                                                                                                                                                                                                               |
|--------------------------------------------------|------------------------------------------------------|----------------------------------------------------------------------------------|------------------------------------------------------------------------------------------------------------|------------------------------------------------|----------------------------------------------------------------------------------------------------------------------------------------------------------------|-------------------------------------------------------------------------------|-------------------------------------------------|--------------------------------------------------------------------------------------------------------------------------------------------------------------------------------------------------------------------------------------------------------------------------------------------------------------------------------------------------------------------------------------------------------------------|
|                                                  | Age (years)                                          | MS-type                                                                          | Severity                                                                                                   | Disease duration (years)                       | Intervention Type [Dose]                                                                                                                                       | Interventionist                                                               | Setting                                         |                                                                                                                                                                                                                                                                                                                                                                                                                    |
| <i>Physical Activity</i>                         |                                                      |                                                                                  |                                                                                                            |                                                |                                                                                                                                                                |                                                                               |                                                 |                                                                                                                                                                                                                                                                                                                                                                                                                    |
| Al-Sharman<br>2019<br>n=40 (10)                  | Intervention: 38.7 (13) yo; control: 31.9 (10) yo    | Not reported                                                                     | EDSS intervention: 2.1 (1.8); Control: 1.9 (1.03)                                                          | Intervention: 9.6 (8.49); Control: 5.43 (4.2)  | Moderate-intensity aerobic exercise [3x/week (50-60 min/session) for 6 weeks]                                                                                  | Not reported                                                                  | Intervention: supervised setting; control: home | Compared to HEP, MAE group had significant improvement on the PSQI (p=0.004), ISI (p=0.04), sleep efficiency (p=0.04) and WASO (p=0.003) (assessed via actigraphy) and increase in serotonin (p=0.002).                                                                                                                                                                                                            |
| Andreu-Caravaca<br>2021<br>n=18 (0)              | 44.88 (10.62) yo                                     | 16 PP, 2 RR                                                                      | EDSS: 3.12 (1.74)                                                                                          | Not reported                                   | Resistance training [3x/week for 10 weeks]                                                                                                                     | Supervised by researcher                                                      | Sports center                                   | Sleep quality and comfort, ease of falling asleep, and feeling of rest (sleep diary, p<0.05) improved after 10 weeks of PRT (RNw1 vs RNw10).                                                                                                                                                                                                                                                                       |
| Cederberg<br>2021<br>n=15 (1)                    | Intervention: 55.6 (9.5) yo; Control: 57.4 (13.0) yo | Intervention: 7 (100%) RR; Control: 6 (85.7%) RR, 1 (14.3%) PP                   | EDSS score median (IQR): intervention 4.0 (.5); Control 4.0 (1.0)                                          | Intervention: 22.0 (4.4); Control: 20.0 (7.3)  | Physical activity [16-week program with 12 one-on-one video chats]                                                                                             | Behavioral coach                                                              | Home                                            | Significant positive effect of the intervention on RLS symptom severity (p=.01, ηp2=.43), RLS severity during the night (p=.03, ηp2=.35), during the day while resting (p=.01, ηp2=.44), during the day while active (p<.01, ηp2=.61), and on sleep satisfaction (p=.01, ηp2=.49). There was a significant effect of the intervention on self-reported TIB (p=.03, ηp2=.37) and total sleep time (p=.03, ηp2=.36). |
| Grubic-Kezele<br>2021<br>n=24 (0)                | Intervention: 50.0 (9.3) yo; Control: 53.8 (11.8) yo | Intervention: 53.8% RR, 15.4% PP, 30.8% SP; Control: 36.3% RR, 9.1% PP, 54.5% SP | Intervention (EDSS median (range), mean (SD)): 3.0 (1.0–7.5), 3.8 (1.8); Control: 5.0 (1.0–7.0), 4.0 (2.0) | Not reported                                   | Exercise [2x/week, 60 min/session for 8 weeks]                                                                                                                 | Physiotherapist                                                               | MS Society Center (MSSC)                        | Statistically significant group-by-time interaction for insomnia severity (p = 0.023, ηp2 = 0.213) and daytime sleep dysfunction (p = 0.031, ηp2 = 0.195).                                                                                                                                                                                                                                                         |
| Jeong<br>2020<br>n=17 (0)                        | 60.1 (11.4) yo                                       | Self-report: progressing 5(29.4%), stable 11(64.7%), improving: 1(5.9%)          | Self-assessed: 5 Mild (29.4%), 10 moderate (59.8%), 2 severe (11.2%)                                       | 26.0 (13.5), range: 2.5-50.8 (Since diagnosis) | Exercise telerehabilitation [Instructed in individualized exercise plan and asked to perform daily for 3 months (mean total time over 3mo: 30.7 (19.8) hours)] | Physiotherapist                                                               | Home                                            | Average changes between baseline and 3-month reassessment for PSQI sleep efficiency, PSQI sleep disturbances, PSQI daytime disturbances, and PSQI total score were -0.1 (84.7 at BL to 84.5 at 3M), 0.9 (6.4 at BL to 7.3 at 3M), 0.5 (1.0 at BL to 1.5 at 3M) and 0.2 (6.7 at BL to 6.9 at 3M) respectively [indicating a slight worsening in general of sleep from BL to 3M].                                    |
| Kozlowski<br>2017<br>n=13 (8)                    | Median: 47 yo; Range: 38-62 yo                       | 92% progressive MS                                                               | EDSS: 6.5 (5.5-7)                                                                                          | Not reported                                   | Exoskeleton-assisted walking [3x/week (30-90min/session) for 8 weeks]                                                                                          | “Research personnel who completed the device manufacturer’s training program” | Outpatient MS clinic/tertiary care hospital     | 1 participant had improved sleep disturbance, 1 had worse sleep disturbance, the 6 did not exceed the conditional MDC threshold [note only 5 completed >20 walking sessions].                                                                                                                                                                                                                                      |

|                                    |                                                                                                              |                                                             |                                                                                                                                         |                                                                                     |                                                                                                                                                                                                                                                               |                                                                                                |                                      |                                                                                                                                                                                                                                                                                                                                                 |
|------------------------------------|--------------------------------------------------------------------------------------------------------------|-------------------------------------------------------------|-----------------------------------------------------------------------------------------------------------------------------------------|-------------------------------------------------------------------------------------|---------------------------------------------------------------------------------------------------------------------------------------------------------------------------------------------------------------------------------------------------------------|------------------------------------------------------------------------------------------------|--------------------------------------|-------------------------------------------------------------------------------------------------------------------------------------------------------------------------------------------------------------------------------------------------------------------------------------------------------------------------------------------------|
| Mehrabani 2021<br>n=41 (5)         | 50 (10.3) yo                                                                                                 | 26 RR (63.4%)                                               | (EDSS< 4) 18 (43.9%);<br>(4 < /= EDSS</= 6.5) 23 (56.1%)<br>(PDDS= 0) 2 (4.8%);<br>(PDDS< 3) 10 (24.3%);<br>(3</= PDDS</= 6) 29 (70.7%) | 14.3 (11.3)                                                                         | Physical activity intervention [1x/week (15-30 min/session) for 15 weeks (two 7 week stages)]                                                                                                                                                                 | “Intervention coach”                                                                           | Home                                 | Significant change from baseline to post intervention for sleep quality (p=.034, effect size .35) but was not sustained at long-term follow up.                                                                                                                                                                                                 |
| Pilutti 2014<br>n=82 (6)           | Intervention: 48.4 (9.1) yo; Control: 49.5 (9.2) yo                                                          | Intervention: 31 RR, 8 SP, 2 PP; Control: 34 RR, 2 SP, 5 PP | PDDS median (IQR):<br>Intervention: 2.0 (4.0); Control: 3.0 (3.0)                                                                       | Intervention: 10.6 (7.1); Control: 13.0 (9.1)                                       | Internet-delivered lifestyle physical activity intervention [15 web-based video coaching sessions; seven in the first 2 months, six in the second 2 months, and two in the final 2 months. New content uploaded throughout intervention; daily pedometer log] | Behavioral coaches; “highly trained doctoral students or a postdoctoral fellow”                | Real-world; web-based video sessions | Favorable non-significant effect of the intervention on sleep quality post-trial (p=.06, np2=.05, Cohen's d = .45).                                                                                                                                                                                                                             |
| Sadeghi Bahmani 2019a<br>n=51 (5)  | 50.74 (11.28) yo                                                                                             | Not reported                                                | EDSS: 5.3; females: 5.49 (1.11); males: 4.89 (1.27)                                                                                     | Not reported                                                                        | Aerobic exercise and physiotherapy [5x/wk (30 min/session) endurance training sessions for 3 weeks; two physiotherapy sessions per day; progressive resistance training (45 min) and a low-intensity physiotherapeutic session (30 min)]                      | Sport scientist for exercise intervention; Interventionist for physiotherapy not reported.     | Inpatient rehabilitation center      | Significant reduction in insomnia severity (p = 0.048), sleep onset latency (p < .01), and wake time after sleep onset (p = .04) and increase in sleep efficacy improved (p = .04).                                                                                                                                                             |
| Sadeghi Bahmani 2019b<br>n=92 (21) | Coordination training: 39.17 (8.66) yo; endurance training: 37.96 (8.69) yo; active Control: 37.90 (9.91) yo | Not reported                                                | EDDS Coordination training: 3.38 (1.87); Endurance training: 2.46 (1.50); Active Control: 2.02 (1.84)                                   | Groups Coordination: 8.13 (6.37); Workout: 6.92 (6.81); Active Control: 7.21 (6.57) | Group aerobic exercise or coordinative training [3x/wk (30-45min/session) for 8 weeks]                                                                                                                                                                        | “Professional instructors” monitored the intervention; clinical psychologist monitored control | Hospital setting                     | Sleep complaints decreased over time (time x group interaction, p<.05, ES=0.32). Cohen's d for change in ISI from baseline to week 8 for the endurance group, coordination group, and active control were 0.53 (Medium), 0.62 (Medium), and 0.11 (Small), respectively [p-values not provided for within group change from baseline to week 8]. |
| Sadeghi Bahmani 2020<br>n=62 (2)   | AE 2x/wk: 39.35 (7.10) yo ; AE 3x/wk: 40.61 (8.97 yo); ACC: 33.77 (6.56) yo                                  | Not reported                                                | EDSS Median (range):<br>Intervention: AE 2x/wk: 3.00 (5.00); AE 3x/wk: 1.5 (4.00); Active                                               | AE 2x/wk: 8.87 (3.60); AE 3x/wk: 6.58 (3.92); Active control: 6.34 (4.34)           | Aquatic exercise [2x/wk OR 3x/wk (60min/session) for 8 weeks]                                                                                                                                                                                                 | “Certified instructor” organized and supervised aerobic exercise;                              | Rehabilitation center of hospital    | Non-significant intervention effect on sleep (p=0.079, np2=0.09) [sleep complain data provided in "pre-trial" Table 1 is same as in "post-trial" Table 2 which makes interpretation of results difficult].                                                                                                                                      |

|                               |                                                              |                                                |                                                      |                                                                                      |                                                                                                                                                                     |                                                                                                       |                                                     |                                                                                                                                                                                                                                                                                                                                                                                                                                                                                           |
|-------------------------------|--------------------------------------------------------------|------------------------------------------------|------------------------------------------------------|--------------------------------------------------------------------------------------|---------------------------------------------------------------------------------------------------------------------------------------------------------------------|-------------------------------------------------------------------------------------------------------|-----------------------------------------------------|-------------------------------------------------------------------------------------------------------------------------------------------------------------------------------------------------------------------------------------------------------------------------------------------------------------------------------------------------------------------------------------------------------------------------------------------------------------------------------------------|
|                               |                                                              |                                                | control: 1.50 (6.00)                                 |                                                                                      |                                                                                                                                                                     | Control: clinical psychologist                                                                        |                                                     |                                                                                                                                                                                                                                                                                                                                                                                                                                                                                           |
| Siengsukon 2016<br>n=33 (3)   | Intervention: 48.9 (13.6) yo; Control: 50.9 (12.2) yo        | Intervention: 10 RR, 2 SP; Control: 9 RR, 1 SP | MSFC AE: 0.395 (0.89); WS: 0.868 (0.68)              | AE:10.8 (8.4); WS: 9 (5.6)                                                           | Aerobic exercise [3x/wk (60min/session) for 12 weeks]                                                                                                               | Not reported                                                                                          | Not reported                                        | Both groups improved on PSQI (main effect sleep p=0.006; np2=0.336) but no sig between group difference (p=0.447; np2=0.031); there was a significant between group difference on ESS (p=0.018; np2=0.263).                                                                                                                                                                                                                                                                               |
| Vasudevan 2021<br>n=10 (0)    | Not reported                                                 | Not reported                                   | Not reported                                         | First MS attack occurred: n =3 <10 years ago, n=5 11-19 years ago, n=2 20+ years ago | Personalized yoga therapy [12 private (1 therapist:2 patient ratio) hour-long weekly sessions over 3 months and 3 group sessions of education (90-100 min/session)] | Certified yoga therapists                                                                             | Private setting                                     | Non-significant (p=0.061) improvement in sleep quality.                                                                                                                                                                                                                                                                                                                                                                                                                                   |
| <b>CBT-I</b>                  |                                                              |                                                |                                                      |                                                                                      |                                                                                                                                                                     |                                                                                                       |                                                     |                                                                                                                                                                                                                                                                                                                                                                                                                                                                                           |
| Clancy 2015<br>n=11 (unclear) | 52 (11) yo                                                   | 8 RR, 3 progressive MS                         | Not reported                                         | Not reported                                                                         | Individual or group-based CBT-I [2-16 sessions; mean: 8 (4.8)]                                                                                                      | "Clinician"                                                                                           | Not reported                                        | Most individuals (86%) reported improvement in insomnia with an average ISI score 21 before CBT-I and average ISI score of 17 after treatment [ISI scores recorded for only 7 of 11 participants because ISI not used by clinic until 2010]. Most individuals (73%) reported an increase in TST (average improvement 1.5 hours).                                                                                                                                                          |
| Loveless 2019<br>n=1 (n/a)    | 55 yo                                                        | RR                                             | Not reported                                         | "Started in early 1990s"                                                             | CBT-I [Biweekly, 13 total sessions]                                                                                                                                 | Postdoctoral fellow and a practicum student supervised by an attending licensed clinical psychologist | University health system behavioral medicine clinic | Patient reported improvement in self-report sleep quality; sleep log demonstrated an increase in sleep efficiency (from 29.0% to 74.49%) and TST (from 2.69 hrs to 5.86 hrs) and decrease in sleep latency (from 145 min to 60 min), WASO (from 240 min to 60 min), and early morning awakenings (from 110 min to 0 min); At post-treatment, scored 6/28 on ISI and 2/24 on Epworth Sleepiness Scale.                                                                                     |
| Majendie 2017<br>n=1 (n/a)    | 40 yo                                                        | SP                                             | "wheel chair bound" (no measure explicitly reported) | "At least 9 years"                                                                   | CBT-I [1x/week (60min/session) for 8 weeks, plus homework with each session]                                                                                        | Psychologist                                                                                          | Local Community Neuro Service Clinic                | Improvement in global PSQI from 10 at start to 5 at end of treatment and to 1 at 7 months post treatment; overall improvements in sleep log outcomes.                                                                                                                                                                                                                                                                                                                                     |
| Siengsukon 2021<br>n=41 (21)  | Intervention: 50.1 (11.8) yo; Control: 53.8 (6.9) yo         | wCBTi: 10 RR; wCBTi + calls: 9 RR, 1 SP        | PDDS wCBTi: 1.3 (1.5); wCBTi + calls: 2.4 (1.3)      | Not reported                                                                         | Web-based CBT-I [41 total daily lessons over 6 weeks (with or without one-on-one telephone calls)]                                                                  | Research personnel trained in motivational interviewing                                               | Not reported                                        | Both groups demonstrated significant improvement in ISI (wCBT-I: p<0.001; wCBT-I + calls: p=0.005) but no significant difference between groups (p=0.068); both groups showed significant improvements in PSQI (wCBT-I: p<0.001; wCBT-I + calls: p=0.028).                                                                                                                                                                                                                                |
| Siengsukon 2020<br>n=33 (3)   | CBTi: 51.1 (7.9) yo; ACC: 50.4 (12.4) yo; BE: 56.9 (10.1) yo | CBTi 8 RR, 2 SP; ACC 10 RR, BE 9 RR, 1 SP      | PDDS CBTi: 1.3 (2.21); ACC 1.7 (2.3); BE 2.0 (2.1)   | CBTi: 17.3 (8.5); ACC: 9.1 (8.9); BE: 18.3 (11.4)                                    | CBT-I [1x/week (45-60min/session) (one-on-one) for 6 weeks]                                                                                                         | Trained CBT-I specialist/PT                                                                           | Not reported                                        | All 3 groups showed a significant large reduction on ISI (CBT-I: p<0.001, ES=2.729; AC: p=0.002, ES=1.018; BE: p<0.001; ES=2.570) with the CBT-I showing the largest change (-13.8); CBT-I and BE showed a significant large improvement on PSQI (CBT-I: p<0.001, ES2.314; BE: p<0.001, 1.672) with CBT-I having largest magnitude in change (-6.7); CBT-I and BE group showed significant increase in SSE (CBT-I: p<0.001; BE: p=0.044) but only CBT-I showed a large effect (ES=1.221). |

|                                                                            |                                                                |                                                     |                                                                        |                                                                                                                                |                                                                                                                                             |                                                                        |                            |                                                                                                                                                                                                                                                                                                                                                                                                                                                            |
|----------------------------------------------------------------------------|----------------------------------------------------------------|-----------------------------------------------------|------------------------------------------------------------------------|--------------------------------------------------------------------------------------------------------------------------------|---------------------------------------------------------------------------------------------------------------------------------------------|------------------------------------------------------------------------|----------------------------|------------------------------------------------------------------------------------------------------------------------------------------------------------------------------------------------------------------------------------------------------------------------------------------------------------------------------------------------------------------------------------------------------------------------------------------------------------|
| Williams-Cooke 2021<br>n=25 (3)<br>(secondary analysis of Siengsukon 2020) | CBTi: 49.25 (7.72) yo; ACC: 50.38 (13.96) yo; BE: 58.78 (8.66) | CBTi 7RR, 1 SP; ACC 8 RR, 0 SP; BE 8 RR, 1 SP       | Not reported                                                           | CBTi: 13.88 (5.14); ACC: 8.88 (10.02); BE: 19.22 (11.72)                                                                       | CBT-I [1x/week (45-60min/session; one-on-one) for 6 weeks]                                                                                  | Trained CBT-I specialist/PT                                            | Not reported               | For the sleep log outcomes, the CBT-I group showed a significant increase in SE (p = 0.006, ES = 1.203) and reduction in TIB (p = 0.001, ES = 0.993) and variability in SE (p = 0.026, ES = 0.657). For the actigraphy outcomes, the CBT-I group demonstrated a significant reduction in TIB (p = 0.005, ES = 0.925) and TST (p = 0.004, ES = 0.893). The active control group showed a significant increase in variability in SE (p = 0.035, ES = 0.463). |
| <i>CBT/Psychotherapy</i>                                                   |                                                                |                                                     |                                                                        |                                                                                                                                |                                                                                                                                             |                                                                        |                            |                                                                                                                                                                                                                                                                                                                                                                                                                                                            |
| Abbasi 2016<br>n=72 (6)                                                    | intervention: 35.3 (5.3) yo; Control 33.2 (8.9) yo             | Intervention: 85.2% RR; Control: 88.3% RR           | Not reported                                                           | Intervention: 5.6 (5.8); Control: 6.1 (6.5)                                                                                    | CBT – [1x/wk (90min/session), 8 total group sessions]                                                                                       | Psychiatric nurse (the researcher)                                     | Not reported               | Significant difference in sleep quality between the control vs. intervention groups at post intervention and one month follow-up (p<0.001). Sleep quality for participants in the intervention group had a significant difference (p<0.001) across the three time points (baseline, post, follow up) but there was no significant change over time for the control group.                                                                                  |
| Baron 2011<br>n=127 (7)<br>(secondary analysis)                            | CBT: 48.9 (9.6) yo; SEFT: 47.6 (10.1) yo                       | 89% RR, PP 10%, 1 did not report type               | Guy's Neurological Disability Scale: CBT: 23.9 (5.8); SEFT: 22.9 (6.7) | Not reported                                                                                                                   | Telephone administered psychotherapy for depression [1x/wk (50min/session) for 16 weeks]                                                    | Doctoral level psychologists with 1-5 years of post degree experience  | Telephone                  | 78% (n=98) reported insomnia of any type 3 or more times/week at baseline which declined to 43% (n=53) at post treatment [did not report within group change in insomnia or between group comparison in Results].                                                                                                                                                                                                                                          |
| Kiropoulos 2016<br>n=30 (0)                                                | CBT: 34.60 (9.06) yo; TAU: 39.27 (9.93) yo                     | RR                                                  | 100% "Able to walk independently without aid"                          | Since diagnosis /since first symptoms (months): Intervention: 26.20 (15.58)/35.54 (16.47) Control: 23.53 (16.06)/30.57 (18.68) | CBT [1x/week (60min/session) for 8 weeks (first session 90min)]                                                                             | A senior clinical psychologist and a provisional clinical psychologist | Outpatient hospital clinic | Significant group differences on the PSQI score post intervention (p<0.001) and at 20-week follow-up (p<0.01). Cohen's d for PSQI pre to post was 1.31 and pre to 20mo follow up was 1.06.                                                                                                                                                                                                                                                                 |
| <i>Mindfulness/Relaxation</i>                                              |                                                                |                                                     |                                                                        |                                                                                                                                |                                                                                                                                             |                                                                        |                            |                                                                                                                                                                                                                                                                                                                                                                                                                                                            |
| Cavalera 2019<br>n=139 (49)                                                | intervention: 42.26 (8.35) yo; Control: 43.19 (9.02) yo        | Intervention: 94% RR, 6% SP; Control: 92% RR, 8% SP | EDSS: Intervention median: 3; Control median: 3                        | Since MS diagnosis: intervention mean 12.64 (8.15); Control mean 14.24 (7.27)                                                  | Online mindfulness meditation [1x/week group sessions for 8 weeks]                                                                          | Expert MBSR trainer                                                    | Skype                      | A strong effect was found on sleep at the post-intervention evaluation (p<0.001, np2=0.130), but no statistical difference between groups was found after 6 months (p=0.202, np2=0.017).                                                                                                                                                                                                                                                                   |
| Dayapoglu 2012<br>n=35 (3)                                                 | 38.15 (9.48) yo                                                | Not reported                                        | Not reported                                                           | < 2 yr 43.8%, 3-5 years 18.8%; 6-8 yrs 15.5%; >8 yrs 21.9%                                                                     | Progressive muscle relaxation [1x 60min patient education session about PMRT under supervision of instructor; After education the exercises | Researcher; no details provided on who provides education              | Neurology polyclinic; home | Global PSQI score decreased from before PMRT to after (p<0.001); There was a significant improvement in the PSQI subscales of subjective sleep quality (p<0.001), sleep latency (p<0.001), sleep duration (p<0.05), sleep efficiency (p<0.05), sleep disorder (p<0.001), and daytime dysfunction (p<0.001).                                                                                                                                                |



|                                                             |                                                       |                      |                                                    |                                                              |                                                                                                                                                                                         |                                                                                                           |                                                      |                                                                                                                                                                                                                                                                                                                                                                                                                                                                                                                                                                                                                                                                                                                                                                                                                                                                                             |
|-------------------------------------------------------------|-------------------------------------------------------|----------------------|----------------------------------------------------|--------------------------------------------------------------|-----------------------------------------------------------------------------------------------------------------------------------------------------------------------------------------|-----------------------------------------------------------------------------------------------------------|------------------------------------------------------|---------------------------------------------------------------------------------------------------------------------------------------------------------------------------------------------------------------------------------------------------------------------------------------------------------------------------------------------------------------------------------------------------------------------------------------------------------------------------------------------------------------------------------------------------------------------------------------------------------------------------------------------------------------------------------------------------------------------------------------------------------------------------------------------------------------------------------------------------------------------------------------------|
|                                                             |                                                       |                      |                                                    |                                                              | are performed at home 1x/day for 6 weeks; Two weeks after education session, participants come to clinic and perform PMRT under instructor's supervision]                               |                                                                                                           |                                                      |                                                                                                                                                                                                                                                                                                                                                                                                                                                                                                                                                                                                                                                                                                                                                                                                                                                                                             |
| Hoogerwerf 2017<br>n=59 (20)                                | 48.2 (8.5) yo                                         | 67% RR, 33% SP       | EDSS: 3.9 (1.7)<br>(range: 1–7.5)                  | 11.2 (7.9),<br>(range:1–32)                                  | Mindfulness-based cognitive therapy [1x/wk group meetings of 150min/session for 8 weeks spread over a period of 10 weeks with homework and exercises of up to 60min/day, 6 days a week] | Certified MBCT trainers with a minimum of 2 years of experience with MBCT and in working with MS patients | Not reported                                         | For SCL-90-sleep, the effect size was small (partial $\eta^2= 0.08$ ) and not significant at the different assessment time points ( $p=0.030$ ; $\alpha=0.01$ ).                                                                                                                                                                                                                                                                                                                                                                                                                                                                                                                                                                                                                                                                                                                            |
| Lorenz 2021<br>n=34 (16)                                    | 47.1 (10.9) yo                                        | Not reported         | EDSS: 1.6 (1.1)                                    | Since diagnosis: 11.2 (6.5); since symptom onset: 14.5 (9.0) | Mindfulness-based stress reduction plus sleep retraining [1 orientation session followed by 60min/week training for 8 weeks]                                                            | Certified MBSR instructor and sleep expert                                                                | Primarily virtual but comparator group was in clinic | Both videoconference and control groups had reduced number of awakenings ( $p=0.039$ and $p=0.032$ , respectively). In the videoconference group, Cohen's d effect sizes suggested a moderate to large pre to post effect on sleep behaviors ( $p=0.145$ ; $d=0.36$ ), sleep efficiency ( $p=0.042$ ; $d=0.78$ ), and total sleep time ( $p=0.156$ ; $d=0.54$ ). No statistically significant differences between groups on sleep outcomes at post-intervention but a small effect on total sleep time ( $p=0.522$ ; $d=0.35$ ) and sleep behavior ( $p=0.458$ ; $d=0.33$ ) was seen. A one-way repeated measures ANOVA including baseline, post-intervention, three-month post-intervention for videoconference group suggested a small-to medium effect on self-reported sleep quality ( $p=0.415$ ; partial $\eta^2=0.278$ ) and sleep behaviors ( $p=0.069$ ; partial $\eta^2=0.257$ ). |
| Sessanna 2021<br>n=14 (0)<br>(secondary analysis of Lorenz) | Range: 30-70 yo                                       | Not reported         | EDSS < 7                                           | Not reported                                                 | Mindfulness-based stress reduction plus sleep retraining [1 orientation session followed by 60min/week training for 8 weeks]                                                            | Certified MBSR instructor and sleep expert                                                                | Mainly virtual but in clinic comparator              | Both formats proved to be acceptable and provide an effective mode of delivery to a variety of adults with MS who experience a wide variety of symptoms and levels of disability.                                                                                                                                                                                                                                                                                                                                                                                                                                                                                                                                                                                                                                                                                                           |
| Simpson 2018<br>n=33 (0)<br>(secondary analysis)            | Range: 21-66 yo                                       | Mixed, but mostly RR | EDSS: 4.5 (range: 1-7)                             | Not reported                                                 | Mindfulness-based stress reduction [1x/week for 8 weeks]                                                                                                                                | Certified MBSR instructors                                                                                | NHS center for integrated care                       | Improved sleep was commonly reported                                                                                                                                                                                                                                                                                                                                                                                                                                                                                                                                                                                                                                                                                                                                                                                                                                                        |
| <b>Education and Self-management Support</b>                |                                                       |                      |                                                    |                                                              |                                                                                                                                                                                         |                                                                                                           |                                                      |                                                                                                                                                                                                                                                                                                                                                                                                                                                                                                                                                                                                                                                                                                                                                                                                                                                                                             |
| Akbarfahimi 2020<br>n=22 (2)                                | intervention: 37.5 (8.89) yo; Control: 39.7 (7.90) yo | Not reported         | EDSS Intervention: 1.6 (0.97); Control: 1.2 (1.03) | Not reported                                                 | Occupational therapy-based sleep intervention [1x/wk (30-45 min/session) for 8 weeks]                                                                                                   | Occupational therapist                                                                                    | Occupational therapy clinic                          | Sleep quality for the intervention group significantly improved from baseline to reassessment ( $p<0.001$ ) but not the control group. [not clear what p-value set for significance because states "level of significance was $p = 0.05$ and was adjusted familywise for multiple comparisons"]                                                                                                                                                                                                                                                                                                                                                                                                                                                                                                                                                                                             |

|                                                    |                                                                      |                                                                                                                                                           |                                                                                                        |                                                                                                                         |                                                                                                                                                                                                                                                                                                                      |                                                                                                                                                                                      |                                        |                                                                                                                                                                                                                                                                                                                                                                                                         |
|----------------------------------------------------|----------------------------------------------------------------------|-----------------------------------------------------------------------------------------------------------------------------------------------------------|--------------------------------------------------------------------------------------------------------|-------------------------------------------------------------------------------------------------------------------------|----------------------------------------------------------------------------------------------------------------------------------------------------------------------------------------------------------------------------------------------------------------------------------------------------------------------|--------------------------------------------------------------------------------------------------------------------------------------------------------------------------------------|----------------------------------------|---------------------------------------------------------------------------------------------------------------------------------------------------------------------------------------------------------------------------------------------------------------------------------------------------------------------------------------------------------------------------------------------------------|
|                                                    |                                                                      |                                                                                                                                                           |                                                                                                        |                                                                                                                         | with 2-3 sessions/week by telephone]                                                                                                                                                                                                                                                                                 |                                                                                                                                                                                      |                                        |                                                                                                                                                                                                                                                                                                                                                                                                         |
| Hugos 2019<br>n=218 (14)                           | Intervention (FTC): 53.9 (9.8) yo;<br>Control (MSTC): 53.6 (10.5) yo | Intervention (FTC): 62.6% RR, 14.0% SP, 24.3% PP;<br>Control (MSTC): 55.6% RR, 19.4% SP, 24.1% PP                                                         | EDSS mean (SD, range)<br>Intervention (FTC): 5.1 (1.1, 3.5-6.5);<br>Control (MSTC): 5.3 (1.1, 3.0-6.5) | Intervention (FTC): 12.3 (7.6) (range: 1.59-34.96);<br>Control (MSTC): 12.7, (9.3) (range: 0.25-41.78) (from diagnosis) | Multi component fatigue management program [1x/week group sessions(120min/session) for 6 weeks]                                                                                                                                                                                                                      | “MS professionals”                                                                                                                                                                   | Outpatient MS clinic                   | No significant change in PSQI either at program completion (p=0.09) or at the 3-month follow-up in the FTC (p=0.83). Sleep quality improved in the FTC group at 6 months (p < 0.0001) and there was a significant difference between groups by this time point (p = 0.004).                                                                                                                             |
| Munger 2021<br>n=21 (0)                            | intervention 47.9 (4) yo; Comparator 48.9 (4.4) yo                   | Intervention: 75% RR; comparator: 67% RR                                                                                                                  | Not reported                                                                                           | Not reported                                                                                                            | Cognitive rehabilitation [Varied and individualized; average of 3-4 sessions]                                                                                                                                                                                                                                        | Occupational therapist and SLP                                                                                                                                                       | Real-world clinic                      | Sleep Disturbance scores improved after participation in the ICRP (p = 0.005); no significant change in Sleep Disturbance in the comparison group. [no between group difference provided].                                                                                                                                                                                                              |
| Sauter 2008<br>n=32 (5)                            | Not reported                                                         | 53% RR, 47% progressive MS (13.3% PP, 33.3% SP)                                                                                                           | EDSS: 4.0 (1.9)                                                                                        | 11.8 (7.2); range 2.5-27.3                                                                                              | Fatigue management [1x/week group sessions(120min/session) for 6 weeks]                                                                                                                                                                                                                                              | Not reported                                                                                                                                                                         | Not reported                           | The PSQI was significantly improved after the course and remained improved after 7-9 months (p=0.004); the sleep efficiency component score was significantly reduced at 7-9 months (p=0.047).                                                                                                                                                                                                          |
| <i>Complementary and Alternative Interventions</i> |                                                                      |                                                                                                                                                           |                                                                                                        |                                                                                                                         |                                                                                                                                                                                                                                                                                                                      |                                                                                                                                                                                      |                                        |                                                                                                                                                                                                                                                                                                                                                                                                         |
| Becker 2016<br>n=14 (0)                            | 54.14 (9.65) yo                                                      | 1 Benign sensory, 6 RR, 2 PP, 2 SP, 3 unclear                                                                                                             | Not reported                                                                                           | 13.64 (7.99) (from diagnosis)                                                                                           | Acupuncture + health promotion education [8 90 minute classes with acupuncture before or after each 30 minute class]                                                                                                                                                                                                 | Classes delivered by nurse certified in MS nursing. Acupuncture delivered by a licensed and national board-certified acupuncturist (third author), or one of her clinical colleagues | Not reported                           | Pre to post PROMIS sleep disturbance scores improved (p=0.009).                                                                                                                                                                                                                                                                                                                                         |
| Jensen 2018<br>n=35 (3)                            | 57.53 (10.63) yo                                                     | MS onset course: 23 (72%) RR, 8 (25%) progressive MS, 1 (3%) not reported;<br>Current disease course: 17 (53%) RR, 6 (19%) SP, 3 (9%) PP, 6 (19%) unclear | Not reported                                                                                           | Since diagnosis: 20.09 (10.00);<br>Since symptoms began: 28.52 (13.63)                                                  | neurofeedback + hypnosis or mindfulness meditation + hypnosis [6 sessions (3 weeks 2x/week) of either (a) neurofeedback or (b) mindfulness meditation followed by a single face-to-face hypnosis session and then four sessions of neurofeedback/mindfulness meditation provided just before four (audiotaped) self- | MM-HYP: 1 of 3 bachelor-level research staff who were trained and supervised by a clinical psychologist expert in mindfulness-based treatments; NF: staff; in-person HYP: clinical   | Outpatient Medical Center or MS clinic | A large non-significant time x condition effect for sleep disturbance (p=0.17; $\eta^2p = 0.15$ ); a large significant time effect for the NF-HYP condition (p=0.03; $\eta^2p = 0.61$ ) and a large non-significant time effect for the MM-HYP condition (p=0.40; $\eta^2p = 0.33$ ). The improvement was maintained at the 1-month reassessment for the NF-HYP condition but not the MM-HYP condition. |

|                                  |                 |                                                                              |                                                                                                                  |                                                                                                                                                                         |                                                                                                                                                                                    |                                             |                                                        |                                                                                                                                                                                                                                                                                                                                                     |
|----------------------------------|-----------------|------------------------------------------------------------------------------|------------------------------------------------------------------------------------------------------------------|-------------------------------------------------------------------------------------------------------------------------------------------------------------------------|------------------------------------------------------------------------------------------------------------------------------------------------------------------------------------|---------------------------------------------|--------------------------------------------------------|-----------------------------------------------------------------------------------------------------------------------------------------------------------------------------------------------------------------------------------------------------------------------------------------------------------------------------------------------------|
|                                  |                 |                                                                              |                                                                                                                  |                                                                                                                                                                         | hypnosis training sessions or (c) 3 weeks 2x/week of a waiting period followed by a single face-to-face hypnosis session and then four audiotaped self-hypnosis training sessions] | psychologist experienced with hypnosis      |                                                        |                                                                                                                                                                                                                                                                                                                                                     |
| Lynning 2021<br>n=9 (2)          | 51.6 yo         | 6 RR, 1 SP, 2 PP                                                             | Not reported                                                                                                     | 12.7 (from diagnosis)                                                                                                                                                   | Trauma releasing exercises [1x/week (30-45min/session) for 9 weeks with instructor and daily at home after the second session]                                                     | TRE instructor + home                       | Home; info about sessions with instructor not reported | Sleep quality significantly increased (p<0.05).                                                                                                                                                                                                                                                                                                     |
| Sajadi 2020<br>Iran<br>n=70 (7)  | Range: 18-50 yo | 100% RR                                                                      | EDSS ≤ 4                                                                                                         | Not reported                                                                                                                                                            | Foot reflexology [2x/week (30-40 min/session) for 4 weeks]                                                                                                                         | Certified foot reflexologist (first author) | Private room                                           | There was a significant difference between the two groups' PSQI scores at baseline (p=0.04). The difference in sleep quality between the reflexology and control group was statistically significant after the intervention (p=0.001). PSQI scores statistically improved from before to after the intervention in the reflexology group (p=0.003). |
| Sgoifo 2017<br>Italy<br>n=48 (0) | Not reported    | Intervention: 83.3% RR, 0% PP, 16.7% SP; Control: 91.7% RR, 4.2% PP, 4.2% SP | EDDS mean (SD, range): Intervention: 3.15 (1.97, 1-6.5); control: 3.44, (2.01, 0-7.5); combined mean 3.29 (1.97) | Since symptoms mean (SD, range): Intervention: 10.5 (8.2, 0-27); Control: 16.1, (11.1, 3-43); Since diagnosis: Intervention 8.2 (7.3, 0-27); Control: 10.5, (8.5, 0-33) | Integrated imaginative distention [8 weekly (60min/session) group training sessions in 8 months]                                                                                   | Single skilled psychotherapist              | Not reported                                           | No significant improvement in ISI between the intervention group and control group (p = 0.146).                                                                                                                                                                                                                                                     |

Table 2. Details of study sample, intervention, and major sleep finding. 3M = 3 month reassessment; ACC = Active Control Condition; AE = Aquatic/Aerobic Exercise; BE = Basic Education; BI = baseline; EDSS = Expanded Disease Status Scale; FTC = Fatigue: Take Control; HEP = Home Exercise Program; HYP = Hypnosis; IAYT = International Association of Yoga Therapists; ICRP= Integrated Cognitive Rehabilitation Program; MAE = Moderate-Intensity Aerobic Exercise Program; MBCT = Mindfulness Based Cognitive Therapy; MBSR = Mindfulness Based Stress Reduction; MDC = minimal detectable change; MCID = Minimal Clinically Important Difference; MFIS = Modified Fatigue Impact Scale; MM = Mindfulness Meditation; MSFC = Multiple Sclerosis Functional Composite; MSTC = Multiple Sclerosis: Take Control; NHS = National Health Service; PDDS = Patient Determined Disease Steps; PHQ-9 = Patient Health Questionnaire; PMRT = Progressive Muscle Relaxation Technique; PP = Primary Progressive [Multiple Sclerosis]; PT = Physical Therapist; RLS = Restless Legs Syndrome; RN = Rest Night; RR = Relapse-Remitting [Multiple Sclerosis]; SE = Sleep Efficiency; SEFT = Supportive Emotion-Focused Therapy; SLP = Speech-Language Pathologist; SP = Secondary Progressive [Multiple Sclerosis]; SSE = Sleep Self Efficacy; TAU = Treatment as Usual; TIB = Time in Bed; TN = Training Night; TRE = Trauma Releasing Exercises; TST = Total Sleep Time; WS = Walking and Stretching program.

| First Author          |              |              |              |              |              |                |     |     |     |     |              |         |     | Quality Score (%) |
|-----------------------|--------------|--------------|--------------|--------------|--------------|----------------|-----|-----|-----|-----|--------------|---------|-----|-------------------|
| RCT                   | Q1           | Q2           | Q3           | Q4           | Q5           | Q6             | Q7  | Q8  | Q9  | Q10 | Q11          | Q12     | Q13 |                   |
| Abbasi                | Yes          | Not reported | Yes          | Not reported | No           | Not reported   | No  | No  | No  | Yes | Not reported | Unclear | Yes | 35                |
| Akbarfahimi           | Yes          | Yes          | No           | No           | Yes          | Yes            | Yes | Yes | No  | Yes | Not reported | Unclear | Yes | 65                |
| Al-Sharman            | Yes          | Unclear      | Yes          | No           | No           | Yes            | Yes | No  | No  | Yes | Yes          | Yes     | Yes | 65                |
| Baron                 | Unclear      | Not reported | Yes          | Not reported | No           | Yes            | Yes | Yes | Yes | Yes | Yes          | Yes     | Yes | 74                |
| Cavalera              | Yes          | Not reported | Yes          | No           | Not reported | Not reported   | Yes | Yes | Yes | Yes | Not reported | Yes     | Yes | 62                |
| Hugos                 | Yes          | Not reported | Yes          | Yes          | No           | Not reported   | No  | No  | Yes | Yes | Not reported | Yes     | Yes | 54                |
| Kiropoulos            | Yes          | Yes          | Yes          | No           | No           | Not reported   | Yes | Yes | No  | Yes | Not reported | No      | Yes | 54                |
| Pilutti               | Yes          | Not reported | Yes          | Not reported | Not reported | Not reported   | Yes | Yes | No  | Yes | Not reported | No      | Yes | 46                |
| Sadeghi Bahmani 2019a | Yes          | Yes          | No           | Not reported | No           | Not reported   | Yes | Yes | No  | Yes | Not reported | No      | Yes | 46                |
| Sadeghi Bahmani 2020  | Yes          | Yes          | Yes          | Not reported | Not reported | Not reported   | Yes | Yes | No  | Yes | Not reported | No      | Yes | 54                |
| Sajadi                | Yes          | Yes          | No           | Yes          | Not reported | Yes            | Yes | No  | No  | Yes | Not reported | No      | Yes | 54                |
| Sgoifo                | Yes          | Not reported | Yes          | No           | Not reported | N/A            | Yes | No  | Yes | Yes | Not reported | Yes     | Yes | 54                |
| Pilot RCT             | Q1           | Q2           | Q3           | Q4           | Q5           | Q6             | Q7  | Q8  | Q9  | Q10 | Q11          | Q12     | Q13 |                   |
| Cederberg             | Unclear      | Not reported | Yes          | No           | No           | Unclear        | Yes | Yes | No  | Yes | No           | Yes     | Yes | 54                |
| Grubic Kezele         | Not reported | Not reported | Not reported | Not reported | Not reported | Yes            | Yes | No  | No  | Yes | Not reported | No      | Yes | 31                |
| Jensen                | Unclear      | Not reported | Not reported | Not reported | Not reported | Not reported   | Yes | Yes | No  | Yes | Not reported | Yes     | Yes | 42                |
| Siengsukon 2016       | Unclear      | Not reported | Yes          | Not reported | Not reported | Yes            | Yes | No  | No  | Yes | Not reported | No      | Yes | 42                |
| Slengsukon 2020       | Unclear      | Not reported | No           | Not reported | Not reported | Yes            | Yes | No  | No  | Yes | Not reported | No      | Yes | 35                |
| Williams-Cooke        | Unclear      | Not reported | No           | Not reported | Not reported | Yes            | Yes | No  | No  | Yes | Not reported | No      | Yes | 35                |
| Siengsukon 2021       | Unclear      | Not reported | Yes          | Not reported | Not reported | Not reported   | Yes | Yes | No  | Yes | Not reported | No      | Yes | 42                |
| Quasi-experimental    | Q1           | Q2           | Q3           | Q4           | Q5           | Q6             | Q7  | Q8  | Q9  |     |              |         |     |                   |
| Lorenz                | Yes          | Yes          | Yes          | Yes          | No           | No             | Yes | No  | Yes |     |              |         |     | 67                |
| Munger                | Yes          | No           | Yes          | Yes          | No           | Not applicable | Yes | No  | No  |     |              |         |     | 50                |

| Pre-post Single Group | Q1  | Q2  | Q3      | Q4               | Q5             | Q6               | Q7  | Q8           | Q9           | Q10 | Q11 | Q12            |  |    |
|-----------------------|-----|-----|---------|------------------|----------------|------------------|-----|--------------|--------------|-----|-----|----------------|--|----|
| Andreu-Caravaca       | Yes | Yes | Yes     | Not reported     | No             | Yes              | Yes | Not reported | Yes          | Yes | No  | Not applicable |  | 64 |
| Becker                | Yes | Yes | Yes     | Cannot determine | No             | Cannot determine | Yes | Not reported | Not reported | Yes | No  | Not applicable |  | 55 |
| Dayapoglu             | Yes | Yes | Yes     | Not reported     | No             | Not reported     | Yes | Not reported | No           | Yes | No  | Not applicable |  | 45 |
| Hoogerwerf            | Yes | No  | Yes     | No               | No             | Yes              | Yes | No           | No           | Yes | Yes | Not applicable |  | 55 |
| Jeong                 | Yes | No  | Yes     | Not reported     | No             | No               | Yes | Not reported | Yes          | No  | No  | Not applicable |  | 36 |
| Kozlowski             | Yes | Yes | Yes     | Not reported     | No             | No               | yes | Not reported | No           | No  | No  | not applicable |  | 36 |
| Lynning               | Yes | Yes | Yes     | Not reported     | No             | No               | Yes | Not reported | No           | Yes | No  | not applicable |  | 45 |
| Mehrabani             | Yes | Yes | Yes     | Not reported     | Yes            | Yes              | Yes | Not reported | Not reported | Yes | No  | Not applicable |  | 64 |
| Sadhegi Bahmani 2019b | Yes | Yes | Yes     | Cannot determine | No             | No               | Yes | Not reported | No           | Yes | No  | Not applicable |  | 50 |
| Sauter                | No  | No  | Yes     | Not reported     | No             | Not reported     | Yes | Not reported | No           | Yes | No  | Not applicable |  | 27 |
| Vasudevan             | Yes | No  | Yes     | No               | No             | No               | No  | No           | Yes          | Yes | No  | Not applicable |  | 36 |
| Case Series           | Q1  | Q2  | Q3      | Q4               | Q5             | Q6               | Q7  | Q8           | Q9           | Q10 |     |                |  |    |
| Clancy                | Yes | Yes | Unclear | Not applicable   | Not applicable | Yes              | No  | Yes          | Yes          | Yes |     |                |  | 81 |
| Case Report           | Q1  | Q2  | Q3      | Q4               | Q5             | Q6               | Q7  | Q8           |              |     |     |                |  |    |
| Loveless              | Yes | Yes | Yes     | Yes              | Yes            | Yes              | No  | Yes          |              |     |     |                |  | 88 |
| Majendie              | No  | No  | No      | Yes              | Yes            | Yes              | No  | Yes          |              |     |     |                |  | 50 |
| Qualitative Research  | Q1  | Q2  | Q3      | Q4               | Q5             | Q6               | Q7  | Q8           | Q9           | Q10 |     |                |  |    |
| Simpson               | Yes | Yes | Yes     | Yes              | Yes            | No               | No  | Yes          | Yes          | Yes |     |                |  | 80 |
| Sessanna              | No  | Yes | Yes     | Yes              | Yes            | No               | No  | Yes          | Yes          | Yes |     |                |  | 70 |

Table 3. Quality appraisal.
